# Supplementary material for: Prospective observational study of gender and ethnicity biases in respiratory protective equipment for healthcare workers in the COVID-19 pandemic
Source: PubMed Central journal article supplement — BMJ Open. 2021 May 20;11(5):e047716. doi: 10.1136/bmjopen-2020-047716 (PMC8141377; doi:10.1136/bmjopen-2020-047716), 2021-05-20
Supplement: bmjopen-2020-047716.draft_revisions.pdf [file bmjopen-2020-047716.draft_revisions.pdf]

# BMJ Open

BMJ Open is committed to open peer review. As part of this commitment we make the peer review history of every article we publish publicly available.

When an article is published we post the peer reviewers' comments and the authors' responses online. We also post the versions of the paper that were used during peer review. These are the versions that the peer review comments apply to.

The versions of the paper that follow are the versions that were submitted during the peer review process. They are not the versions of record or the final published versions. They should not be cited or distributed as the published version of this manuscript.

BMJ Open is an open access journal and the full, final, typeset and author-corrected version of record of the manuscript is available on our site with no access controls, subscription charges or pay-per-view fees (<http://bmjopen.bmj.com>).

If you have any questions on BMJ Open's open peer review process please email [info.bmjopen@bmj.com](mailto:info.bmjopen@bmj.com)

# BMJ Open

## Gender and ethnicity biases in respiratory protective equipment for healthcare workers in the COVID-19 pandemic

|                               |                                                                                                                                                                                                                                                                                                                                                                                                                                                                                                                                                                                                                                                                       |
|-------------------------------|-----------------------------------------------------------------------------------------------------------------------------------------------------------------------------------------------------------------------------------------------------------------------------------------------------------------------------------------------------------------------------------------------------------------------------------------------------------------------------------------------------------------------------------------------------------------------------------------------------------------------------------------------------------------------|
| Journal:                      | <i>BMJ Open</i>                                                                                                                                                                                                                                                                                                                                                                                                                                                                                                                                                                                                                                                       |
| Manuscript ID                 | bmjopen-2020-047716                                                                                                                                                                                                                                                                                                                                                                                                                                                                                                                                                                                                                                                   |
| Article Type:                 | Original research                                                                                                                                                                                                                                                                                                                                                                                                                                                                                                                                                                                                                                                     |
| Date Submitted by the Author: | 06-Dec-2020                                                                                                                                                                                                                                                                                                                                                                                                                                                                                                                                                                                                                                                           |
| Complete List of Authors:     | Carvalho, Clarissa; Guy's and St Thomas' NHS Foundation Trust Anaesthetic Service, Theatres Anaesthetics & Perioperative Medicine<br>Schumacher, Jan; Guy's and St Thomas' NHS Foundation Trust Anaesthetic Service, Theatres Anaesthetics & Perioperative Medicine<br>Greig, Paul; Guy's and St Thomas' NHS Foundation Trust Anaesthetic Service, Theatres Anaesthetics & Perioperative Medicine<br>Wong, Danny; Guy's and St Thomas' NHS Foundation Trust Anaesthetic Service, Theatres Anaesthetics & Perioperative Medicine<br>El Boghdady, Kariem; Guy's and St Thomas' NHS Foundation Trust Anaesthetic Service, Theatres Anaesthetics & Perioperative Medicine |
| Keywords:                     | COVID-19, Health & safety < HEALTH SERVICES ADMINISTRATION & MANAGEMENT, OCCUPATIONAL & INDUSTRIAL MEDICINE, Adult intensive & critical care < ANAESTHETICS                                                                                                                                                                                                                                                                                                                                                                                                                                                                                                           |
|                               |                                                                                                                                                                                                                                                                                                                                                                                                                                                                                                                                                                                                                                                                       |

SCHOLARONE™  
Manuscripts

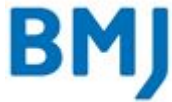

I, the Submitting Author has the right to grant and does grant on behalf of all authors of the Work (as defined in the below author licence), an exclusive licence and/or a non-exclusive licence for contributions from authors who are: i) UK Crown employees; ii) where BMJ has agreed a CC-BY licence shall apply, and/or iii) in accordance with the terms applicable for US Federal Government officers or employees acting as part of their official duties; on a worldwide, perpetual, irrevocable, royalty-free basis to BMJ Publishing Group Ltd ("BMJ") its licensees and where the relevant Journal is co-owned by BMJ to the co-owners of the Journal, to publish the Work in this journal and any other BMJ products and to exploit all rights, as set out in our [licence](#).

The Submitting Author accepts and understands that any supply made under these terms is made by BMJ to the Submitting Author unless you are acting as an employee on behalf of your employer or a postgraduate student of an affiliated institution which is paying any applicable article publishing charge ("APC") for Open Access articles. Where the Submitting Author wishes to make the Work available on an Open Access basis (and intends to pay the relevant APC), the terms of reuse of such Open Access shall be governed by a Creative Commons licence – details of these licences and which [Creative Commons](#) licence will apply to this Work are set out in our licence referred to above.

Other than as permitted in any relevant BMJ Author's Self Archiving Policies, I confirm this Work has not been accepted for publication elsewhere, is not being considered for publication elsewhere and does not duplicate material already published. I confirm all authors consent to publication of this Work and authorise the granting of this licence.

1  
2  
3  
4  
5  
6  
7  
8  
9  
10  
11  
12  
13  
14  
15  
16  
17  
18  
19  
20  
21  
22  
23  
24  
25  
26  
27  
28  
29  
30  
31  
32  
33  
34  
35  
36  
37  
38  
39  
40  
41  
42  
43  
44  
45  
46  
47  
48  
49  
50  
51  
52  
53  
54  
55  
56  
57  
58  
59  
60

## Gender and ethnicity biases in respiratory protective equipment for healthcare workers in the Covid-19 pandemic

Carvalho CYM,<sup>1</sup> Schumacher J,<sup>1,2</sup> Greig P,<sup>1,3</sup> Wong DJN,<sup>1</sup> El-Boghdadly K<sup>1,2</sup>

1 Consultant, Trainee, Theatres, Anaesthesia and Perioperative Medicine, Guy's and St Thomas' NHS Foundation Trust, London, UK

2 King's College London, London, UK

3 Nuffield Department of Clinical Neurosciences, University of Oxford, Oxford, UK

### Correspondence to:

Dr Clarissa Carvalho

Anaesthetic Department

Guy's & St Thomas' NHS Foundation Trust

Westminster Bridge Road

London SE1 7EH

[Clarissa.carvalho@gstt.nhs.uk](mailto:Clarissa.carvalho@gstt.nhs.uk)

No additional data is available but any queries will be answered by emailing

[Clarissa.carvalho@gstt.nhs.uk](mailto:Clarissa.carvalho@gstt.nhs.uk)

**Word Count** = 2182 words (excluding title page, abstract, references, figures and tables)

### Contributorship Statement

Dr Clarissa Carvalho was the study lead, lead researcher and writer of this article. Dr Jan Schumacher, Dr Paul Greig and Dr Kariem El-Boghdadly contributed to the design of the study, the results interpretation and the writing and review of the manuscript. Dr Danny Wong and Dr Paul Greig reviewed the results and conducted the statistical analysis. Dr Danny Wong also contributed to the interpretation of the results and the writing of the manuscript.

**Copyright:**

The Corresponding Author, Dr Clarissa Carvalho, has the right to grant on behalf of all authors and does grant on behalf of all authors, an exclusive licence on a worldwide basis to the BMJ Publishing Group Ltd to permit this article (if accepted) to be published in BMJ editions and any other BMJPG L products and sublicences such use and exploit all subsidiary rights.

**Short title:** Gender, ethnicity and fit testing

**Keywords:** COVID-19, PPE, RPE, fit testing, infection, ethnicity, gender

**Competing Interests:**

No Competing Interests. All authors have completed the Unified Competing Interest form and declare: no support from any organisation for the submitted; no financial relationships with any organisations that might have an interest in the submitted work in the previous three years; no other relationships or activities that could appear to have influenced the submitted work

**Transparency Declaration:**

The lead author, Dr Clarissa Carvalho, affirms that the manuscript is an honest, accurate and transparent account of the study reported. No important aspects of the study have been omitted and there were no discrepancies from the study as planned.

**Ethical Approval:** This study was assessed by the Research & Development Lead and the Clinical Governance Lead and was deemed exempt from ethical review as it met the criteria for a service evaluation. It was registered as a service evaluation with Guy's and St Thomas' NHS Foundation Trust (ID 10918).

**Funding:** No funding was required and no funding was provided.

**Sponsor:** The study sponsor was responsible for the management and progression of the study

**Statement of Independence of Researchers from funders:** Each researcher worked independently of funding. No funding was required for this study.

**Patient and Public Involvement:** No patient or public involvement in this study.

## Abstract

### Objective:

To describe success rates of respiratory protective equipment (RPE) fit testing and factors associated with achieving suitable fit.

### Design:

Prospective observational study of RPE fit testing according to health and safety, and occupational health requirements.

### Setting:

A large tertiary referral UK healthcare facility.

### Population:

1182 healthcare workers undergoing quantitative fit testing.

### Main outcome measures:

Quantitative fit test success (pass/fail), and the count of tests each participant required before successful fit.

### Results:

Healthcare workers were fit tested a median (interquartile range [IQR]) 2 (1–3) times before successful fit was obtained. Males were tested a median 1 (1–2) times, while females were tested a median 2 (1–2) times before a successful fit was found. This difference was statistically significant ( $p < 0.001$ ). Modelling each fit test as its own independent trial ( $n = 2359$ ) using multivariable logistic regression, male healthcare workers were significantly more likely to find a well-fitting respirator and achieve a successful fit on first attempt in comparison to females, after adjusting for other factors (adjusted odds ratio [OR] = 2.07, 95% confidence interval [CI]: 1.66–2.60,  $p < 0.001$ ). Staff who described their ethnicity as White were also more likely to achieve a successful fit compared to staff who described their ethnicity as Asian (OR = 0.47, 95% CI: 0.38–0.58,  $p < 0.001$ ), Black (OR = 0.54, 95% CI: 0.41–0.71,  $p < 0.001$ ), Mixed (OR = 0.50, 95% CI: 0.31–0.80,  $p = 0.004$ ), or Other (OR = 0.53, 95% CI: 0.29–0.99,  $p = 0.043$ ).

## Conclusions

Male and white ethnicity healthcare workers are more likely to achieve RPE fit test success. This has broad operational implications to healthcare services with a large female and Black, Asian and minority ethnic groups population. Fit-testing is imperative in ensuring RPE effectiveness in protecting healthcare workers during the Covid-19 pandemic and beyond.

## Article Summary

This is a prospective observational study looking at fit testing of respiratory protective equipment (RPE) as per Health & Safety and Occupational Health requirements at a large tertiary referral teaching hospital in Central London.

1182 healthcare workers underwent fit testing. Our data demonstrates that male and white ethnicity healthcare workers were significantly more likely to achieve a successful fit and required fewer fit tests.

This data is important as the demographic of the healthcare workforce does not predominantly consist of white male workers. The NHS as a whole consists of 77% female healthcare workers and up to 40% of the workforce identify as Black, Asian or Minority Ethnic (BAME) in London. As many healthcare facilities fail to formally fit test their workforce this leaves a large proportion of staff vulnerable to inadvertent exposure to Covid-19. This proportion of staff will be mainly female and from BAME backgrounds. Unfortunately the review of healthcare worker deaths has shown that a disproportionately high number were from BAME backgrounds. A number of reasons have been postulated but inadequate RPE fit was not one of them until now. The design of RPE has not changed much since the 1960s when it was based on face panels created using volunteers from the US Air Force in 1967-68. The Certification and assessment of new RPE is also based on the anthropometric data collected from these volunteers. As the US Air Force consisted predominantly of white men of a certain height and stature it is clear to see why these masks would fail to fit the average female healthcare worker, particularly those of BAME backgrounds. Fit-testing is imperative in ensuring healthcare worker safety when

1  
2  
3 facing the Covid-19 pandemic. Future work on RPE designs must take in to BAME  
4 and female Healthcare staff.  
5  
6  
7

### 8 **Strengths & Weaknesses**

- 9  
10  
11
- 12 • Single centre study
  - 13 • Demographics of the workforce observed in our study accurately reflects  
14 those of the NHS workforce in London, UK. But may not reflect the rest of the  
15 country.  
16
  - 17 • A large number of fit tests and participants were observed
  - 18 • Each individual did not test on every model of face mask
  - 19 • Anthropometric measurements were not collected
- 20  
21  
22  
23  
24  
25  
26  
27  
28  
29  
30  
31  
32  
33  
34  
35  
36  
37  
38  
39  
40  
41  
42  
43  
44  
45  
46  
47  
48  
49  
50  
51  
52  
53  
54  
55  
56  
57  
58  
59  
60



## Gender and ethnicity biases in respiratory protective equipment for healthcare workers in the Covid-19 pandemic

Carvalho CYM, Schumacher J, Greig P, Wong DJN, El-Boghdadly K

### Introduction

The Covid-19 pandemic has dramatically affected the delivery of healthcare. Many routine procedures that produce potentially infectious aerosols were previously conducted regularly without protective face coverings, but this is no longer appropriate during the pandemic. Preventing aerosolised spread of infection from patients to healthcare workers relies on effective use of respiratory protective equipment (RPE), including tight-fitting filtering facepiece (FFP) respirators.[1-3] Protection of healthcare workers with suitable RPE must be prioritised as their exposure places them at high risk of contracting infection with Covid-19.[4-5] Critical shortages in the availability of adequate RPE have been highlighted, with healthcare workers from Black, Asian and minority ethnic (BAME) groups being disproportionately affected.[6]

The effectiveness of a respirator depends on a good fit on the healthcare workers' face.[7-9] Although respirators are designed to fit the majority of individuals, no single respirator can provide a universal fit.[8-11] The fit of RPE has been suggested to be unsuitable for women and BAME healthcare workers, however there remains insufficient objective data demonstrating this disparity. There is therefore a need to assess the ethnodemographic impact on suitability of respirators provided by employers. The purpose of this observational study is therefore to determine if

1  
2  
3 ethnicity and gender are factors in the suitability of respirators in healthcare workers  
4  
5 exposed to patients with Covid-19.  
6  
7  
8  
9  
10

## 11 12 **Methods**

13  
14  
15  
16 We conducted a prospective observational study examining fit testing results by  
17  
18 ethnicity and gender from staff in a central London teaching hospital and designated  
19  
20 Covid-19 centre. This study was deemed exempt from ethical review as it met the  
21  
22 criteria for a service evaluation and was registered as a service evaluation with Guy's  
23  
24 and St Thomas' NHS Foundation Trust (ID 10918). No patients or members of the  
25  
26 public were included in this study. All members of the workforce in patient-facing roles  
27  
28 were eligible to attend the fit testing clinic. We included healthcare workers who  
29  
30 were eligible to attend the fit testing clinic. We included healthcare workers who  
31  
32 underwent quantitative fit tests (QNFT) only. Exclusion criteria were healthcare  
33  
34 workers who were not in patient-facing roles, those unable to undertake the fit testing  
35  
36 procedure (e.g. unable to remove head wear, remove facial hair, or unable to perform  
37  
38 the procedure), those that underwent only qualitative fit testing, or those unwilling to  
39  
40 participate in fit testing.  
41  
42  
43  
44  
45

46 Fit testing data were collected between 3<sup>rd</sup> February and 3<sup>rd</sup> July 2020 and included  
47  
48 the participant's self-described gender and ethnicity in free-text. For the purposes of  
49  
50 this study the free-text responses were mapped to the Office of National Statistics  
51  
52 categories for ethnicity as used in the UK census.[15]  
53  
54  
55

56  
57 Fit testing was conducted by certified fit testers. Participants had to refrain from  
58  
59 smoking one hour prior to the test, had to be clean shaven and could not wear any  
60

1  
2  
3 head wear. The QNFT involved the use of a TSI Portacount 8030 (TSI UK, High  
4 Wycombe) using the standard Health and Safety Executive fit testing procedure.<sup>[15]</sup>  
5  
6  
7  
8  
9

10 QNFT fit test scores were dichotomised as pass or fail based on achieving an overall  
11 fit factor >100. We report the overall numbers and proportions of staff who passed  
12 their first fit test and grouped by self-reported gender and ethnicity. The likelihood of  
13 passing the first fit test for male and female genders, and White and BAME groups  
14 were compared using Pearson's Chi-squared test (without Yate's Continuity, as all cell  
15 frequencies were greater than 10). Logistic regression modelling was performed using  
16 each fit test as a separate observation, with the binary outcome variable defined as fit  
17 test success (pass/fail), and using the following explanatory variables: gender,  
18 ethnicity and mask design (disposable vs reusable). We first modelled the bivariate  
19 association between the outcome variable and each explanatory variable separately,  
20 and then in a multivariable model including all explanatory variables to obtain adjusted  
21 odds ratio (OR) estimates. Mask designs were specified in our models as categorical  
22 variables and were compared against a reference design A, which was our most  
23 widely-tested disposable mask design. All analyses were performed in Microsoft Excel  
24 (Microsoft Corporation, Redmond, WA, USA) and R version 3.5.2 (R Foundation for  
25 Statistical Computing, Vienna, Austria). Only records with complete data for the  
26 variables modelled (gender, ethnicity, mask design, outcome of fit test) were analysed.  
27  
28 Continuous variables are reported as mean (standard deviation [SD]) for normally- or  
29 uniformly-distributed data, or median (interquartile range [IQR]) for data with skewed  
30 distributions. For discrete variables, numbers and proportions are reported. Non-  
31 parametric data were compared with the Mann-Whitney U test, and the students t test  
32  
33  
34  
35  
36  
37  
38  
39  
40  
41  
42  
43  
44  
45  
46  
47  
48  
49  
50  
51  
52  
53  
54  
55  
56  
57  
58  
59  
60

was used for parametric data. A p value of <0.05 was considered statistically significant.

## Results

A total of 1443 healthcare workers underwent fit testing during the study period. After exclusions were applied, a total of 1182 records were available for analysis. The gender and ethnicity breakdowns for the staff members are described in Table 1.

Table 1: Gender and Ethnicity of the staff that underwent quantitative fit testing

|                  | <i>n (%)</i><br><i>(n = 1182)</i> |
|------------------|-----------------------------------|
| <b>Gender</b>    |                                   |
| Male             | 365 (30.9%)                       |
| Female           | 817 (69.1%)                       |
| <b>Ethnicity</b> |                                   |
| White            | 557 (47.1%)                       |
| Asian            | 383 (32.4%)                       |
| Black            | 175 (14.8%)                       |
| Mixed            | 39 (3.3%)                         |
| Other            | 28 (2.4%)                         |

Each staff member was fit tested a median (IQR) 2 (1–3) times before a successful fit was found. Males were tested a 1 (1–2) times and females 2 (1–2) times before a successful fit was found ( p <0.001).

There were 2359 independent quantitative fit tests modelled using logistic regression (Table 2).

Table 2: Logistic regression models. (D) = disposable mask; (R) = reusable mask.

| Dependent outcome:<br>Successful fit |              | Fail<br>n (%) | Pass<br>n (%) | OR (univariable)          | OR (multivariable)        |
|--------------------------------------|--------------|---------------|---------------|---------------------------|---------------------------|
| Gender                               | Female       | 709 (80.8)    | 1007 (67.9)   | -                         | -                         |
|                                      | Male         | 168 (19.2)    | 475 (32.1)    | 1.99 (1.63-2.44, p<0.001) | 2.07 (1.66-2.60, p<0.001) |
| Ethnicity                            | White        | 301 (34.3)    | 721 (48.7)    | -                         | -                         |
|                                      | Asian        | 357 (40.7)    | 478 (32.3)    | 0.56 (0.46-0.68, p<0.001) | 0.47 (0.38-0.58, p<0.001) |
|                                      | Black        | 154 (17.6)    | 198 (13.4)    | 0.54 (0.42-0.69, p<0.001) | 0.54 (0.41-0.71, p<0.001) |
|                                      | Mixed        | 42 (4.8)      | 51 (3.4)      | 0.51 (0.33-0.78, p=0.002) | 0.50 (0.31-0.80, p=0.004) |
|                                      | Other        | 23 (2.6)      | 34 (2.3)      | 0.62 (0.36-1.08, p=0.083) | 0.53 (0.29-0.99, p=0.043) |
| RPE mask model                       | Design A (D) | 63 (7.2)      | 307 (20.7)    | -                         | -                         |
|                                      | Design B (D) | 9 (1.0)       | 5 (0.3)       | 0.11 (0.03-0.34, p<0.001) | 0.11 (0.03-0.35, p<0.001) |
|                                      | Design C (D) | 159 (18.1)    | 84 (5.7)      | 0.11 (0.07-0.16, p<0.001) | 0.09 (0.06-0.14, p<0.001) |
|                                      | Design D (D) | 38 (4.3)      | 33 (2.2)      | 0.18 (0.10-0.30, p<0.001) | 0.16 (0.09-0.27, p<0.001) |
|                                      | Design E (D) | 87 (9.9)      | 45 (3.0)      | 0.11 (0.07-0.17, p<0.001) | 0.10 (0.06-0.16, p<0.001) |
|                                      | Design F (D) | 47 (5.4)      | 43 (2.9)      | 0.19 (0.11-0.31, p<0.001) | 0.18 (0.11-0.30, p<0.001) |
|                                      | Design G (R) | 3 (0.3)       | 6 (0.4)       | 0.41 (0.11-1.98, p=0.216) | 0.47 (0.12-2.33, p=0.305) |
|                                      | Design H (R) | 2 (0.2)       | 7 (0.5)       | 0.72 (0.17-4.90, p=0.684) | 0.64 (0.14-4.50, p=0.592) |
|                                      | Design I (R) | 14 (1.6)      | 103 (7.0)     | 1.51 (0.83-2.91, p=0.193) | 1.70 (0.93-3.31, p=0.096) |
|                                      | Design J (R) | 214 (24.4)    | 233 (15.7)    | 0.22 (0.16-0.31, p<0.001) | 0.24 (0.17-0.34, p<0.001) |
|                                      | Design K (R) | 86 (9.8)      | 394 (26.6)    | 0.94 (0.66-1.34, p=0.735) | 0.97 (0.67-1.39, p=0.863) |
|                                      | Design L (R) | 152 (17.3)    | 218 (14.7)    | 0.29 (0.21-0.41, p<0.001) | 0.29 (0.21-0.41, p<0.001) |
|                                      | Others       | 3 (0.3)       | 4 (0.3)       | 0.27 (0.06-1.42, p=0.095) | 0.29 (0.06-1.51, p=0.112) |

Table 3: Conditional probabilities of successful first attempt fit by gender and ethnicity.

| Gender | Ethnicity | Failed first fit attempt | Passed first fit attempt | Probability of passing first fit attempt (%) |
|--------|-----------|--------------------------|--------------------------|----------------------------------------------|
| F      | White     | 206                      | 163                      | 44.2                                         |
|        | Asian     | 164                      | 97                       | 37.2                                         |
|        | Black     | 78                       | 65                       | 45.5                                         |
|        | Mixed     | 23                       | 9                        | 28.1                                         |
|        | Other     | 7                        | 5                        | 58.3                                         |
| M      | White     | 80                       | 108                      | 57.4                                         |
|        | Asian     | 66                       | 56                       | 45.9                                         |
|        | Black     | 15                       | 17                       | 53.1                                         |
|        | Mixed     | 3                        | 4                        | 57.1                                         |
|        | Other     | 9                        | 7                        | 43.8                                         |

Male healthcare workers were significantly more likely to pass a fit test and achieve a successful fit test on first attempt compared with females. Staff who describe their ethnicity as White were also more likely to achieve a successful fit test compared to staff who describe their ethnicity as Asian, Black, mixed, or Other. There was wide variation in the likelihood of achieving successful mask fit between the different mask

1  
2  
3 designs. Mask designs demonstrated variable performance in terms of obtaining a  
4  
5 successful fit (Table 2).  
6  
7  
8  
9

## 10 11 **Discussion**

12  
13  
14  
15 We investigated the suitability of respirators worn by healthcare workers and report  
16  
17 new evidence that indicates lower RPE fit testing success rates among BAME and  
18  
19 female healthcare workers.[3,4] This may indicate that certain groups may be at  
20  
21 particular risk from Covid-19 infection in the workplace due to unsuitable respiratory  
22  
23 protection.  
24  
25

26  
27  
28  
29 The demographic diversity in our data may differ to the NHS England workforce.  
30  
31 However, it is not dissimilar to the demographics expected of a healthcare facility in  
32  
33 central London and so it is representative of London healthcare workers. BAME  
34  
35 healthcare workers may account for 19.8% of the NHS workforce in England but ethnic  
36  
37 minority healthcare workers demonstrate a higher representation in London (44.9%)  
38  
39 with 1.7% identifying as having a mixed ethnic background.[13] Failure of RPE to  
40  
41 protect BAME healthcare workers affects a significant proportion of the NHS  
42  
43 workforce.  
44  
45  
46  
47  
48

49  
50 Our data suggests that there could be biases in design and certification of respirators.  
51  
52 Respirator design has historically focused on the fit for individuals from the US Air  
53  
54 Force in the 1967-68.[10,12] However, it is unclear if the anthropometric data  
55  
56 collected was even representative of the workforce in the 1960s and 70s as the US  
57  
58 Air Force had clear height and weight restrictions, and consisted mainly of men.[12]  
59  
60

1  
2  
3 Population demographics have changed drastically in the UK and US since the 1960s,  
4 with increased numbers of women and people from ethnic minorities in all workplaces.  
5  
6 This historical data is therefore unlikely to reflect current workforce demographics.  
7  
8  
9  
10 [6,12,13]  
11

12  
13 Recognising that the standard fit panels may no longer be appropriate, the National  
14 Institute for Occupational Safety and Health (NIOSH) conducted a new survey of the  
15 US work force in 2001.[17] 4026 subjects from 41 different sites in, eight states were  
16 recruited, and new fit moulding panels were proposed based on the anthropometric  
17 data collected.[17] However, the ethnic groups described in this study differ from the  
18 UK. The demographics of the workforce describes one third of the population as  
19 Hispanic and specifically categorises the ethnicities as White, African American,  
20 Hispanic and Other.[12,17] However, the largest ethnic group after White British in  
21 England and Wales is “White other”, followed by Asian – Indian, Asian – Pakistani,  
22 Black – African and Asian other.[16] Although NIOSH suggest their data can be used  
23 as a starting point for design and certification as the US population is ethnically  
24 diverse, the US data may not map accurately to the ethnic makeup of the UK  
25 healthcare workforce. Every individual has different features which vary by gender,  
26 ethnicity and even occupational role.[14] Face length is a key feature in respirator fit  
27 and this has been shown to vary significantly across ethnic and gender groups.[14]  
28 For example, anthropometric data shows statistically significant differences in width  
29 and face and lip length between African Americans and White Americans.[14] A  
30 sample of African Americans and Hispanic individuals in the US workforce were found  
31 to have up to face lengths 2.7 and 2.8 mm longer than White Americans.[14] Prior to  
32 Covid-19 most respirators were used in industrial applications such as construction.  
33 Construction workers are more likely to be male than healthcare staff, and have  
34  
35  
36  
37  
38  
39  
40  
41  
42  
43  
44  
45  
46  
47  
48  
49  
50  
51  
52  
53  
54  
55  
56  
57  
58  
59  
60

1  
2  
3 different facial features, including longer noses.[14] Gender has also been shown to  
4  
5 be a major determinant in facial differences and measurements. Nine out of 10 facial  
6  
7 measurements vary by gender with the female face being significantly smaller than  
8  
9 the male face.[14] This is of relevance to respirator fit in healthcare workers as 77%  
10  
11 of the NHS workforce is female.  
12  
13

14  
15  
16  
17 Future respirator design should consider the facial characteristics of the demographic  
18  
19 of the workforce. Face panels consisting of a true representation of female and BAME  
20  
21 healthcare workers could help improve respirator design and improve safety when  
22  
23 caring for Covid-19 patients. Out-dated fit panels used in the design and certification  
24  
25 of the respirators demonstrate the institutional gender and racial biases in respirator  
26  
27 fit and must be addressed in order to protect BAME and female staff.  
28  
29

30  
31  
32  
33 Use of facial anthropometric data representing the current demographics of the  
34  
35 workforce is not only important in the design of RPE, it can be used to guide  
36  
37 procurement strategies for the ongoing pandemic. For example, females have on  
38  
39 average smaller faces so looking at the different proportions of female versus male  
40  
41 healthcare workers can guide what proportion of the procured respirators should be  
42  
43 smaller versus large.  
44  
45

46  
47  
48  
49 Examining the shape and measurements of the respirator in comparison to a face  
50  
51 panel representing the workforce could help decision making in procurement. These  
52  
53 techniques using facial anthropometric data representative of the workforce and  
54  
55 observing the success or fail rate of different respirator designs in each ethnic or  
56  
57 gender group could help with the decision-making process of which respirators to  
58  
59  
60



1  
2  
3 stock. Guiding procurement processes can prevent excesses of poorly sized  
4  
5 respirators and shortages of the correct sizes.  
6  
7  
8  
9

10 However, even if the correct respirator for the demographic of the workforce was  
11  
12 sourced, supply and demand issues of RPE early in the Covid-19 pandemic meant  
13  
14 healthcare facilities could not rely upon a steady supply of any single preferred  
15  
16 respirator. Every respirator has a different design and fit, therefore individuals should  
17  
18 be fit tested on the respirator model they don prior to patient interactions.[8,15] The  
19  
20 multiple changes in respirator models mean healthcare workers must be repeatedly fit  
21  
22 tested on the new models as supplies change. As healthcare facilities were  
23  
24 overwhelmed with the need to fit test staff repeatedly on different masks many adopted  
25  
26 an approach to fit check only.[9] Our data demonstrates that respirators have a  
27  
28 variable success rate on initial fit test. For example, Design J did not suitably fit 24.4%  
29  
30 of our staff. Some studies have demonstrated a fail rate as high as 78% when a  
31  
32 respirator is used without fit testing.[10] Failure to fit test may leave a significant  
33  
34 proportion of staff inadequately protected against Covid-19 and according to our data  
35  
36 it is mixed ethnicity and Asian female healthcare workers who are at greatest risk.  
37  
38  
39  
40  
41  
42

### 43 **Limitations**

44  
45  
46 This was a single centre, single city study. The demographics of our data is  
47  
48 representative of healthcare facilities in the London however further data should be  
49  
50 collected to extrapolate the results to other areas.  
51

52  
53 A large number of respirators were observed in this study and each individual did not  
54  
55 test on every model. Increased data is required to evaluate the efficacy of each  
56  
57 model.  
58  
59  
60

## Conclusion

Respirator design and certification may be biased towards fitting a demographic that is not reflective of the current healthcare workforce. This could leave many healthcare workers vulnerable as they struggle to fit into a mask not designed for their faces. Lack of design consideration and supply issues could be a dangerous combination for healthcare staff as they rely upon the protection of a properly fitted respirator to reduce the risk of infection transmission whilst caring for patients with Covid-19.

Further research into the design and fit of respiratory protective equipment must consider the demographic of the healthcare workforce as we cannot rely on anthropometric data that represents only one section of the workforce. Creating new fit panels that accurately represent female workers and the ethnically diverse healthcare workforce is an essential first step towards designing well-fitting respirators. In the meantime, it is important to recognise that no one mask will fit all staff. [8-11,15] Therefore the focus should be on employers stocking a suite of RPE, so that a diverse workforce has the best chance of finding a respirator of appropriate fit.

Ensuring fit-testing and keeping adequate stock of a variety of respirator models can help maintain the safety of the whole workforce but future research should focus on the design of respirators for BAME and female healthcare workers.

## References

1. Livingston E, Desai A, Berkwits M. Sourcing Personal Protective Equipment During the COVID-19 pandemic. *JAMA* 2020; 323:1912-1914
2. Public Health England. Guidance - Covid-19 Personal Protective Equipment 2020 <https://www.gov.uk/government/publications/wuhan-novel-coronavirus-infection-prevention-and-control/covid-19-personal-protective-equipment-ppe>
3. The Lancet. Editorial - COVID-19: Protecting health-care workers. March 2020.  
<http://www.sciencedirect.com/science/article/pii/S0140673620306449>
4. El-Boghdadly K, Wong DJN, Owen R, et al. Risks to healthcare workers following tracheal intubation of patients with COVID-19: a prospective international multicentre cohort study. *Anaesthesia* June 2020; 75: 1437-1447
5. Cook T, Kursumovic E, Lennane S. Exclusive: Deaths of NHS Staff from COVID-19 analysed. April 2020 <https://www.hsj.co.uk/exclusive-deaths-of-nhs-staff-from-covid-19-analysed/7027471.article>

- 1  
2  
3 6. Amnesty International. UK among the highest COVID-19 healthcare  
4 worker deaths in the world 2020. [https://www.amnesty.org.uk/press-](https://www.amnesty.org.uk/press-releases/uk-among-highest-covid-19-health-worker-deaths-world)  
5  
6 releases/uk-among-highest-covid-19-health-worker-deaths-world  
7  
8  
9
- 10  
11  
12 7. British Medical Association. BMA survey reveals almost half of doctors  
13 have relied upon donated or self-bought PPE and two thirds still don't feel  
14 fully protected 2020. [https://www.bma.org.uk/bma-media-centre/bma-](https://www.bma.org.uk/bma-media-centre/bma-survey-reveals-almost-half-of-doctors-have-relied-upon-donated-or-self-bought-ppe-and-two-thirds-still-don-t-feel-fully-protected)  
15 survey-reveals-almost-half-of-doctors-have-relied-upon-donated-or-self-  
16 bought-ppe-and-two-thirds-still-don-t-feel-fully-protected  
17  
18  
19  
20  
21  
22  
23
- 24  
25  
26 8. Health and Safety Executive. Fit Testing Face Masks to Avoid  
27 Transmission during the coronavirus outbreak. 2020.  
28  
29  
30  
31  
32  
33  
34  
35  
36  
37  
38  
39  
40  
41  
42  
43  
44  
45  
46  
47  
48  
49  
50  
51  
52  
53  
54  
55  
56  
57  
58  
59  
60  
60  
[https://www.hse.gov.uk/coronavirus/ppe-face-masks/face-mask-ppe-](https://www.hse.gov.uk/coronavirus/ppe-face-masks/face-mask-ppe-rpe.htm)  
rpe.htm
9. The Guardian. Hospitals Accused of Risking Staff Lives by Abandoning  
PPE Fit Tests. March 2020.  
[https://www.theguardian.com/world/2020/apr/14/nhs-hospitals-accused-](https://www.theguardian.com/world/2020/apr/14/nhs-hospitals-accused-of-risking-staff-lives-by-abandoning-ppe-fit-tests-coronavirus)  
of-risking-staff-lives-by-abandoning-ppe-fit-tests-coronavirus
10. Manganyi J, Wilson K, Rees D. Quantitative respirator fit, face sizes and  
determinants of fit in South African diagnostic laboratory respirator users.  
Annals of Work Exposures and Health Nov 2017; 61;9:1154-1162

- 1  
2  
3 11. Oestenstad R, Elliot L, Beasley T. The effect of gender and respirator  
4 brand on the association of respirator fit with facial dimensions. Journal of  
5 Occupational and Environmental Hygiene Dec 2007;4 923-930  
6  
7  
8  
9  
10  
11
- 12 12. Bailar J, Meyer E, Pool R. Institute of Medicine: Assessment of the  
13 NIOSH head-and-face anthropometric survey of US respirator users.  
14 2007 pp1-108  
15  
16  
17  
18  
19  
20  
21
- 22 13. NHS England. NHS Workforce Race and Equality Standard Report 2019.  
23 [https://www.england.nhs.uk/wp-content/uploads/2020/01/wre-2019-data-](https://www.england.nhs.uk/wp-content/uploads/2020/01/wre-2019-data-report.pdf)  
24 [report.pdf](https://www.england.nhs.uk/wp-content/uploads/2020/01/wre-2019-data-report.pdf)  
25  
26  
27  
28  
29  
30
- 31 14. Zhuang Z, Landsittel D, Benson S et al. Facial Anthropometric  
32 differences among gender, ethnicity and age groups. Annals of  
33 Occupational Hygiene Jun 2010; 54(4):391-402  
34  
35  
36  
37  
38  
39
- 40 15. Health and Safety Executive. Guidance on respiratory protective  
41 equipment (RPE) fit testing 2019. [https://www.hse.gov.uk/respiratory-](https://www.hse.gov.uk/respiratory-protective-equipment/)  
42 [protective-equipment/](https://www.hse.gov.uk/respiratory-protective-equipment/)  
43  
44  
45  
46  
47  
48
- 49 16. UK Census 2011. Ethnicity Facts and Figures [https://www.ethnicity-facts-](https://www.ethnicity-facts-figures.service.gov.uk/)  
50 [figures.service.gov.uk/](https://www.ethnicity-facts-figures.service.gov.uk/)  
51  
52  
53  
54  
55
- 56 17. American Industrial Hygiene Association. Respirator Fit Testing Methods  
57 2010 ISBN 978-1-935082-24-8  
58  
59  
60

**Revised Standards for Quality Improvement Reporting Excellence (SQUIRE 2.0)  
September 15, 2015**

| Text Section and Item Name                    | Section or Item Description                                                                                                                                                                                                                                                                                                                                                                                                                                                                                                                                                                                                                                                                                                                                                                                                                                                                                                                                                                                                             |
|-----------------------------------------------|-----------------------------------------------------------------------------------------------------------------------------------------------------------------------------------------------------------------------------------------------------------------------------------------------------------------------------------------------------------------------------------------------------------------------------------------------------------------------------------------------------------------------------------------------------------------------------------------------------------------------------------------------------------------------------------------------------------------------------------------------------------------------------------------------------------------------------------------------------------------------------------------------------------------------------------------------------------------------------------------------------------------------------------------|
| <b>Notes to authors</b>                       | <ul style="list-style-type: none"> <li>• The SQUIRE guidelines provide a framework for reporting new knowledge about how to improve healthcare</li> <li>• The SQUIRE guidelines are intended for reports that describe <a href="#">system</a> level work to improve the quality, safety, and value of healthcare, and used methods to establish that observed outcomes were due to the <a href="#">intervention(s)</a>.</li> <li>• A range of approaches exists for improving healthcare. SQUIRE may be adapted for reporting any of these.</li> <li>• Authors should consider every SQUIRE item, but it may be inappropriate or unnecessary to include every SQUIRE element in a particular manuscript.</li> <li>• The SQUIRE Glossary contains definitions of many of the key words in SQUIRE.</li> <li>• The Explanation and Elaboration document provides specific examples of well-written SQUIRE items, and an in-depth explanation of each item.</li> <li>• Please cite SQUIRE when it is used to write a manuscript.</li> </ul> |
| <b>Title and Abstract</b>                     |                                                                                                                                                                                                                                                                                                                                                                                                                                                                                                                                                                                                                                                                                                                                                                                                                                                                                                                                                                                                                                         |
| <b>1. Title</b>                               | Indicate that the manuscript concerns an <a href="#">initiative</a> to improve healthcare (broadly defined to include the quality, safety, effectiveness, patient-centeredness, timeliness, cost, efficiency, and equity of healthcare) ✓                                                                                                                                                                                                                                                                                                                                                                                                                                                                                                                                                                                                                                                                                                                                                                                               |
| <b>2. Abstract</b>                            | <ol style="list-style-type: none"> <li>a. Provide adequate information to aid in searching and indexing</li> <li>b. Summarize all key information from various sections of the text using the abstract format of the intended publication or a structured summary such as: background, local <a href="#">problem</a>, methods, interventions, results, conclusions</li> </ol>                                                                                                                                                                                                                                                                                                                                                                                                                                                                                                                                                                                                                                                           |
| <b>Introduction</b>                           | <i>Why did you start?</i>                                                                                                                                                                                                                                                                                                                                                                                                                                                                                                                                                                                                                                                                                                                                                                                                                                                                                                                                                                                                               |
| <b>3. <a href="#">Problem Description</a></b> | Nature and significance of the local <a href="#">problem</a> ✓                                                                                                                                                                                                                                                                                                                                                                                                                                                                                                                                                                                                                                                                                                                                                                                                                                                                                                                                                                          |
| <b>4. Available knowledge</b>                 | Summary of what is currently known about the <a href="#">problem</a> , including relevant previous studies ✓                                                                                                                                                                                                                                                                                                                                                                                                                                                                                                                                                                                                                                                                                                                                                                                                                                                                                                                            |

|                                        |                                                                                                                                                                                                                                                                                                                                                                                                                                                                                                                                                                                                                                              |   |
|----------------------------------------|----------------------------------------------------------------------------------------------------------------------------------------------------------------------------------------------------------------------------------------------------------------------------------------------------------------------------------------------------------------------------------------------------------------------------------------------------------------------------------------------------------------------------------------------------------------------------------------------------------------------------------------------|---|
| 5. <b><u>Rationale</u></b>             | Informal or formal frameworks, models, concepts, and/or <a href="#">theories</a> used to explain the <a href="#">problem</a> , any reasons or <a href="#">assumptions</a> that were used to develop the <a href="#">intervention(s)</a> , and reasons why the <a href="#">intervention(s)</a> was expected to work                                                                                                                                                                                                                                                                                                                           | ✓ |
| 6. <b>Specific aims</b>                | Purpose of the project and of this report                                                                                                                                                                                                                                                                                                                                                                                                                                                                                                                                                                                                    | ✓ |
| <b>Methods</b>                         | <i>What did you do?</i>                                                                                                                                                                                                                                                                                                                                                                                                                                                                                                                                                                                                                      |   |
| 7. <b><u>Context</u></b>               | Contextual elements considered important at the outset of introducing the <a href="#">intervention(s)</a>                                                                                                                                                                                                                                                                                                                                                                                                                                                                                                                                    | ✓ |
| 8. <b><u>Intervention(s)</u></b>       | a. Description of the <a href="#">intervention(s)</a> in sufficient detail that others could reproduce it<br>b. Specifics of the team involved in the work                                                                                                                                                                                                                                                                                                                                                                                                                                                                                   |   |
| 9. <b>Study of the Intervention(s)</b> | a. Approach chosen for assessing the impact of the <a href="#">intervention(s)</a><br>b. Approach used to establish whether the observed outcomes were due to the <a href="#">intervention(s)</a>                                                                                                                                                                                                                                                                                                                                                                                                                                            |   |
| 10. <b>Measures</b>                    | a. Measures chosen for studying <a href="#">processes</a> and outcomes of the <a href="#">intervention(s)</a> , including rationale for choosing them, their operational definitions, and their validity and reliability<br>b. Description of the approach to the ongoing assessment of contextual elements that contributed to the success, failure, efficiency, and cost<br>c. Methods employed for assessing completeness and accuracy of data                                                                                                                                                                                            | ✓ |
| 11. <b>Analysis</b>                    | a. Qualitative and quantitative methods used to draw <a href="#">inferences</a> from the data<br>b. Methods for understanding variation within the data, including the effects of time as a variable                                                                                                                                                                                                                                                                                                                                                                                                                                         | ✓ |
| 12. <b>Ethical Considerations</b>      | <a href="#">Ethical aspects</a> of implementing and studying the <a href="#">intervention(s)</a> and how they were addressed, including, but not limited to, formal ethics review and potential conflict(s) of interest                                                                                                                                                                                                                                                                                                                                                                                                                      | ✓ |
| <b>Results</b>                         | <i>What did you find?</i>                                                                                                                                                                                                                                                                                                                                                                                                                                                                                                                                                                                                                    |   |
| 13. <b>Results</b>                     | a. Initial steps of the <a href="#">intervention(s)</a> and their evolution over time (e.g., time-line diagram, flow chart, or table), including modifications made to the intervention during the project<br>b. Details of the <a href="#">process</a> measures and outcome<br>c. Contextual elements that interacted with the <a href="#">intervention(s)</a><br>d. Observed associations between outcomes, interventions, and relevant contextual elements<br>e. Unintended consequences such as unexpected benefits, problems, failures, or costs associated with the <a href="#">intervention(s)</a> .<br>f. Details about missing data | ✓ |
| <b>Discussion</b>                      | <i>What does it mean?</i>                                                                                                                                                                                                                                                                                                                                                                                                                                                                                                                                                                                                                    |   |
| 14. <b>Summary</b>                     | a. Key findings, including relevance to the <a href="#">rationale</a> and specific aims<br>b. Particular strengths of the project                                                                                                                                                                                                                                                                                                                                                                                                                                                                                                            | ✓ |

|                                  |                                                                                                                                                                                                                                                                                                                                                                                                                                                                        |
|----------------------------------|------------------------------------------------------------------------------------------------------------------------------------------------------------------------------------------------------------------------------------------------------------------------------------------------------------------------------------------------------------------------------------------------------------------------------------------------------------------------|
| <p><b>15. Interpretation</b></p> | <p>a. Nature of the association between the <a href="#">intervention(s)</a> and the outcomes</p> <p>b. Comparison of results with findings from other publications</p> <p>c. Impact of the project on people and <a href="#">systems</a></p> <p>d. Reasons for any differences between observed and anticipated outcomes, including the influence of <a href="#">context</a></p> <p>e. Costs and strategic trade-offs, including <a href="#">opportunity costs</a></p> |
| <p><b>16. Limitations</b></p>    | <p>a. Limits to the <a href="#">generalizability</a> of the work</p> <p>b. Factors that might have limited <a href="#">internal validity</a> such as confounding, bias, or imprecision in the design, methods, measurement, or analysis</p> <p>c. Efforts made to minimize and adjust for limitations</p>                                                                                                                                                              |
| <p><b>17. Conclusions</b></p>    | <p>a. Usefulness of the work</p> <p>b. Sustainability</p> <p>c. Potential for spread to other <a href="#">contexts</a></p> <p>d. Implications for practice and for further study in the field</p> <p>e. Suggested next steps</p>                                                                                                                                                                                                                                       |
| <p><b>Other information</b></p>  |                                                                                                                                                                                                                                                                                                                                                                                                                                                                        |
| <p><b>18. Funding</b></p>        | <p>Sources of funding that supported this work. Role, if any, of the funding organization in the design, implementation, interpretation, and reporting</p>                                                                                                                                                                                                                                                                                                             |



**Table 2. Glossary of key terms used in SQUIRE 2.0. This Glossary provides the intended meaning of selected words and phrases as they are used in the SQUIRE 2.0 Guidelines. They may, and often do, have different meanings in other disciplines, situations, and settings.**

### **Assumptions**

Reasons for choosing the activities and tools used to bring about changes in healthcare services at the [system](#) level.

### **Context**

Physical and sociocultural makeup of the local environment (for example, external environmental factors, organizational dynamics, collaboration, resources, leadership, and the like), and the interpretation of these factors (‘sense-making’) by the healthcare delivery professionals, patients, and caregivers that can affect the effectiveness and [generalizability](#) of [intervention\(s\)](#).

### **Ethical aspects**

The value of [system](#)-level [initiatives](#) relative to their potential for harm, burden, and cost to the stakeholders. Potential harms particularly associated with efforts to improve the quality, safety, and value of healthcare services include [opportunity costs](#), invasion of privacy, and staff distress resulting from disclosure of poor performance.

### **Generalizability**

The likelihood that the [intervention\(s\)](#) in a particular report would produce similar results in other settings, situations, or environments (also referred to as external validity).

### **Healthcare improvement**

Any systematic effort intended to raise the quality, safety, and value of healthcare services, usually done at the [system](#) level. We encourage the use of this phrase rather than “quality” which often refers to more narrowly defined approaches.

### **Inferences**

The meaning of findings or data, as interpreted by the stakeholders in healthcare services – improvers, healthcare delivery professionals, and/or patients and families

### **Initiative**

A broad term that can refer to organization-wide programs, narrowly focused projects, or the details of specific interventions (for example, planning, execution, and assessment)

### **Internal validity**

Demonstrable, credible evidence for efficacy (meaningful impact or change) resulting from introduction of a specific intervention into a particular healthcare [system](#).

### **Intervention(s)**

The specific activities and tools introduced into a healthcare [system](#) with the aim of changing its performance for the better. Complete description of an intervention includes its inputs, internal activities, and outputs (in the form of a logic model, for example), and the mechanism(s) by which these components are expected to produce changes in a [system](#) performance.

### **Opportunity costs**

1  
2  
3 Loss of the ability to perform other tasks or meet other responsibilities resulting from the diversion  
4 of resources needed to introduce, test, or sustain a particular [improvement](#) initiative  
5  
6

### 7 **Problem**

8 Meaningful disruption, failure, inadequacy, distress, confusion or other dysfunction in a healthcare  
9 service delivery [system](#) that adversely affects patients, staff, or the [system](#) as a whole, or that  
10 prevents care from reaching its full potential  
11

### 12 **Process**

13 The routines and other activities through which healthcare services are delivered  
14  
15

### 16 **Rationale**

17 Explanation of why particular [intervention\(s\)](#) were chosen and why it was expected to work, be  
18 sustainable, and be replicable elsewhere.  
19

### 20 **Systems**

21 The interrelated structures, people, [processes](#), and activities that together create healthcare services  
22 for and with individual patients and populations. For example, systems exist from the personal self-  
23 care system of a patient, to the individual provider-patient dyad system, to the microsystem, to the  
24 macrosystem, and all the way to the market/social/insurance system. These levels are nested within  
25 each other.  
26  
27

### 28 **Theory or theories**

29 Any “-ig ei a s i o n i g ” a c c o u n t t h a t a s s e r t s c a u s a l r e l a  
30 that makes sense of an otherwise obscure [process](#) or situation (explanatory theory). Theories come  
31 in many forms, and serve different purposes in the phases of [improvement](#) work. It is important to  
32 be explicit and well-founded about any informal and formal theory (or theories) that are used.  
33  
34  
35  
36  
37  
38  
39  
40  
41  
42  
43  
44  
45  
46  
47  
48  
49  
50  
51  
52  
53  
54  
55  
56  
57  
58  
59  
60

# BMJ Open

## A Prospective Observational Study of Gender and ethnicity biases in respiratory protective equipment for healthcare workers in the Covid-19 pandemic

|                                 |                                                                                                                                                                                                                                                                                                                                                                                                                                                                                                                                                                                                                                                                       |
|---------------------------------|-----------------------------------------------------------------------------------------------------------------------------------------------------------------------------------------------------------------------------------------------------------------------------------------------------------------------------------------------------------------------------------------------------------------------------------------------------------------------------------------------------------------------------------------------------------------------------------------------------------------------------------------------------------------------|
| Journal:                        | <i>BMJ Open</i>                                                                                                                                                                                                                                                                                                                                                                                                                                                                                                                                                                                                                                                       |
| Manuscript ID                   | bmjopen-2020-047716.R1                                                                                                                                                                                                                                                                                                                                                                                                                                                                                                                                                                                                                                                |
| Article Type:                   | Original research                                                                                                                                                                                                                                                                                                                                                                                                                                                                                                                                                                                                                                                     |
| Date Submitted by the Author:   | 08-Mar-2021                                                                                                                                                                                                                                                                                                                                                                                                                                                                                                                                                                                                                                                           |
| Complete List of Authors:       | Carvalho, Clarissa; Guy's and St Thomas' NHS Foundation Trust Anaesthetic Service, Theatres Anaesthetics & Perioperative Medicine<br>Schumacher, Jan; Guy's and St Thomas' NHS Foundation Trust Anaesthetic Service, Theatres Anaesthetics & Perioperative Medicine<br>Greig, Paul; Guy's and St Thomas' NHS Foundation Trust Anaesthetic Service, Theatres Anaesthetics & Perioperative Medicine<br>Wong, Danny; Guy's and St Thomas' NHS Foundation Trust Anaesthetic Service, Theatres Anaesthetics & Perioperative Medicine<br>El Boghdady, Kariem; Guy's and St Thomas' NHS Foundation Trust Anaesthetic Service, Theatres Anaesthetics & Perioperative Medicine |
| <b>Primary Subject Heading</b>: | Occupational and environmental medicine                                                                                                                                                                                                                                                                                                                                                                                                                                                                                                                                                                                                                               |
| Secondary Subject Heading:      | Evidence based practice, Global health, Infectious diseases, Intensive care, Public health                                                                                                                                                                                                                                                                                                                                                                                                                                                                                                                                                                            |
| Keywords:                       | COVID-19, Health & safety < HEALTH SERVICES ADMINISTRATION & MANAGEMENT, OCCUPATIONAL & INDUSTRIAL MEDICINE, Adult intensive & critical care < ANAESTHETICS                                                                                                                                                                                                                                                                                                                                                                                                                                                                                                           |
|                                 |                                                                                                                                                                                                                                                                                                                                                                                                                                                                                                                                                                                                                                                                       |

SCHOLARONE™  
Manuscripts



I, the Submitting Author has the right to grant and does grant on behalf of all authors of the Work (as defined in the below author licence), an exclusive licence and/or a non-exclusive licence for contributions from authors who are: i) UK Crown employees; ii) where BMJ has agreed a CC-BY licence shall apply, and/or iii) in accordance with the terms applicable for US Federal Government officers or employees acting as part of their official duties; on a worldwide, perpetual, irrevocable, royalty-free basis to BMJ Publishing Group Ltd ("BMJ") its licensees and where the relevant Journal is co-owned by BMJ to the co-owners of the Journal, to publish the Work in this journal and any other BMJ products and to exploit all rights, as set out in our [licence](#).

The Submitting Author accepts and understands that any supply made under these terms is made by BMJ to the Submitting Author unless you are acting as an employee on behalf of your employer or a postgraduate student of an affiliated institution which is paying any applicable article publishing charge ("APC") for Open Access articles. Where the Submitting Author wishes to make the Work available on an Open Access basis (and intends to pay the relevant APC), the terms of reuse of such Open Access shall be governed by a Creative Commons licence – details of these licences and which [Creative Commons](#) licence will apply to this Work are set out in our licence referred to above.

Other than as permitted in any relevant BMJ Author's Self Archiving Policies, I confirm this Work has not been accepted for publication elsewhere, is not being considered for publication elsewhere and does not duplicate material already published. I confirm all authors consent to publication of this Work and authorise the granting of this licence.

1  
2  
3  
4  
5  
6  
7  
8  
9  
10  
11  
12  
13  
14  
15  
16  
17  
18  
19  
20  
21  
22  
23  
24  
25  
26  
27  
28  
29  
30  
31  
32  
33  
34  
35  
36  
37  
38  
39  
40  
41  
42  
43  
44  
45  
46  
47  
48  
49  
50  
51  
52  
53  
54  
55  
56  
57  
58  
59  
60

## Prospective observational study of gender and ethnicity biases in respiratory protective equipment for healthcare workers in the Covid-19 pandemic

Carvalho CYM,<sup>1</sup> Schumacher J,<sup>1,2</sup> Greig P,<sup>1,3</sup> Wong DJN,<sup>1</sup> El-Boghdadly K<sup>1,2</sup>

1 Consultant, Theatres, Anaesthesia and Perioperative Medicine, Guy's and St Thomas' NHS Foundation Trust, London, UK

2 King's College London, London, UK

3 Nuffield Department of Clinical Neurosciences, University of Oxford, Oxford, UK

### Correspondence to:

Dr Clarissa Carvalho

Anaesthetic Department

Guy's & St Thomas' NHS Foundation Trust

Westminster Bridge Road

London SE1 7EH

[Clarissa.carvalho@gstt.nhs.uk](mailto:Clarissa.carvalho@gstt.nhs.uk)

No additional data is available but any queries will be answered by emailing

[Clarissa.carvalho@gstt.nhs.uk](mailto:Clarissa.carvalho@gstt.nhs.uk)

**Word Count** = 2451 words (excluding title page, abstract, references, figures and tables)

### Contributorship Statement

Dr Clarissa Carvalho was the study lead, lead researcher and writer of this article.

Dr Jan Schumacher, Dr Paul Greig and Dr Kariem El-Boghdadly contributed to the design of the study, the results interpretation and the writing and review of the manuscript. Dr Danny Wong and Dr Paul Greig reviewed the results and conducted the statistical analysis. Dr Danny Wong also contributed to the interpretation of the results and the writing of the manuscript.

**Copyright:**

The Corresponding Author, Dr Clarissa Carvalho, has the right to grant on behalf of all authors and does grant on behalf of all authors, an exclusive licence on a worldwide basis to the BMJ Publishing Group Ltd to permit this article (if accepted) to be published in BMJ editions and any other BMJ PGL products and sublicences such use and exploit all subsidiary rights.

**Short title:** Gender, ethnicity and fit testing

**Keywords:** COVID-19, PPE, RPE, fit testing, infection, ethnicity, gender

**Competing Interests:**

No Competing Interests. All authors have completed the Unified Competing Interest form and declare: no support from any organisation for the submitted; no financial relationships with any organisations that might have an interest in the submitted work in the previous three years; no other relationships or activities that could appear to have influenced the submitted work

**Transparency Declaration:**

The lead author, Dr Clarissa Carvalho, affirms that the manuscript is an honest, accurate and transparent account of the study reported. No important aspects of the study have been omitted and there were no discrepancies from the study as planned.

**Ethical Approval:** This study was assessed by the Research & Development Lead and the Clinical Governance Lead and was deemed exempt from ethical review as it met the criteria for a service evaluation. It was registered as a service evaluation with Guy's and St Thomas' NHS Foundation Trust (ID 10918).

**Funding:** No funding was required and no funding was provided.

**Sponsor:** The study sponsor was responsible for the management and progression of the study

**Statement of Independence of Researchers from funders:** Each researcher worked independently of funding. No funding was required for this study.

## Abstract

### Objective:

To describe success rates of respiratory protective equipment (RPE) fit testing and factors associated with achieving suitable fit.

### Design:

Prospective observational study of RPE fit testing according to health and safety, and occupational health requirements.

### Setting:

A large tertiary referral UK healthcare facility.

### Population:

1443 healthcare workers undergoing quantitative fit testing.

### Main outcome measures:

Quantitative fit test success (pass/fail), and the count of tests each participant required before successful fit.

### Results:

Healthcare workers were fit tested a median (interquartile range [IQR]) 2 (1–3) times before successful fit was obtained. Males were tested a median 1 (1–2) times, while females were tested a median 2 (1–2) times before a successful fit was found. This difference was statistically significant ( $p < 0.001$ ). Modelling each fit test as its own independent trial ( $n = 2359$ ) using multivariable logistic regression, male healthcare workers were significantly more likely to find a well-fitting respirator and achieve a successful fit on first attempt in comparison to females, after adjusting for other factors (adjusted odds ratio [OR] = 2.07, 95% confidence interval [CI]: 1.66–2.60,  $p < 0.001$ ). Staff who described their ethnicity as White were also more likely to achieve a successful fit compared to staff who described their ethnicity as Asian (OR = 0.47, 95% CI: 0.38–0.58,  $p < 0.001$ ), Black (OR = 0.54, 95% CI: 0.41–0.71,  $p < 0.001$ ), Mixed (OR = 0.50, 95% CI: 0.31–0.80,  $p = 0.004$ ), or Other (OR = 0.53, 95% CI: 0.29–0.99,  $p = 0.043$ ).

## Conclusions

Male and white ethnicity healthcare workers are more likely to achieve RPE fit test success. This has broad operational implications to healthcare services with a large female and Black, Asian and minority ethnic groups population. Fit-testing is imperative in ensuring RPE effectiveness in protecting healthcare workers during the Covid-19 pandemic and beyond.

## Strengths & Weaknesses

- Single centre study
- Demographics of the workforce observed in our study accurately reflects those of the NHS workforce in London, UK. But may not reflect the rest of the country.
- A large number of fit tests and participants were observed
- Each individual did not test on every model of face mask
- Anthropometric measurements were not collected
- Other factors affecting the fit testing were not investigated or adjusted for



## Prospective observational study of gender and ethnicity biases in respiratory protective equipment for healthcare workers in the Covid-19 pandemic

Carvalho CYM, Schumacher J, Greig P, Wong DJN, El-Boghdady K

### Introduction

The Covid-19 pandemic has dramatically affected the delivery of healthcare. Many routine procedures that produce potentially infectious aerosols were previously conducted regularly without protective face coverings, but this is no longer appropriate during the pandemic. Preventing aerosolised spread of infection from patients to healthcare workers relies on effective use of respiratory protective equipment (RPE), including tight-fitting filtering facepiece (FFP) respirators.[1-3] Protection of healthcare workers with suitable RPE must be prioritised as their exposure places them at high risk of contracting infection with Covid-19.[4-5] Critical shortages in the availability of adequate RPE have been highlighted, with healthcare workers from Black, Asian and minority ethnic (BAME) groups being disproportionately affected.[6]

The effectiveness of a respirator depends on a good fit on the healthcare workers' face.[7-9] Although respirators are designed to fit the majority of individuals, no single respirator can provide a universal fit.[8-11] The fit of RPE has been suggested to be unsuitable for women and BAME healthcare workers, however there remains insufficient objective data demonstrating this disparity. There is therefore a need to assess the ethnodemographic impact on suitability of respirators provided by

1  
2  
3 employers. The purpose of this observational study is therefore to determine if  
4 ethnicity and gender are factors in the suitability of respirators in healthcare workers  
5 exposed to patients with Covid-19.  
6  
7  
8  
9  
10  
11  
12  
13

## 14 **Methods**

15  
16  
17  
18 We conducted a prospective observational study examining fit testing results by  
19 ethnicity and gender from staff in a central London teaching hospital and designated  
20 Covid-19 centre. This study was deemed exempt from ethical review as it met the  
21 criteria for a service evaluation and was registered with Guy's and St Thomas' NHS  
22 Foundation Trust (ID 10918) as a service evaluation. No patients or members of the  
23 public were included in this study. All members of the workforce in patient-facing roles  
24 were eligible to attend the fit testing clinic. We included healthcare workers who  
25 underwent quantitative fit tests (QNFT) only. Exclusion criteria were healthcare  
26 workers who were not in patient-facing roles, those unable to undertake the fit testing  
27 procedure (e.g. unable to remove head wear, remove facial hair, or unable to perform  
28 the procedure), those that underwent only qualitative fit testing, or those unwilling to  
29 participate in fit testing.  
30  
31  
32  
33  
34  
35  
36  
37  
38  
39  
40  
41  
42  
43  
44  
45  
46  
47

48 Fit testing data were collected between 3<sup>rd</sup> February and 3<sup>rd</sup> July 2020 and included  
49 the participant's self-described gender and ethnicity in free-text. The free-text  
50 responses were mapped to the Office of National Statistics categories for ethnicity as  
51 used in the UK census.[12]  
52  
53  
54  
55  
56  
57  
58  
59  
60

1  
2  
3 Fit testing was conducted by certified fit testers. Participants had to refrain from  
4 smoking one hour prior to the test, had to be clean shaven and could not wear any  
5 head wear. The QNFT involved the use of a TSI Portacount 8030 (TSI UK, High  
6 Wycombe) using the standard Health and Safety Executive fit testing procedure.[13]  
7  
8  
9

10  
11  
12  
13  
14 QNFT fit test scores were dichotomised as pass or fail based on achieving an overall  
15 fit factor >100. We report the overall numbers and proportions of staff who passed  
16 their first fit test and grouped by self-reported gender and ethnicity. The likelihood of  
17 passing the first fit test for male and female genders, and White and BAME groups  
18 were compared using Pearson's Chi-squared test (without Yate's Continuity, as all cell  
19 frequencies were greater than 10). Logistic regression modelling was performed using  
20 each fit test as a separate observation, with the binary outcome variable defined as fit  
21 test success (pass/fail), and using the following explanatory variables: gender,  
22 ethnicity and mask design (disposable vs reusable). We first modelled the bivariate  
23 association between the outcome variable and each explanatory variable separately,  
24 and then in a multivariable model including all explanatory variables to obtain adjusted  
25 odds ratio (OR) estimates. Mask designs were specified in our models as categorical  
26 variables and were compared against a reference design A, which was our most  
27 widely-tested disposable mask design. The following *post hoc* analyses were  
28 performed to assess the possibility that healthcare workers could learn to game the fit  
29 testing process and repeated testing of the same healthcare workers using different  
30 masks could render the tests not independent of each other: First we fitted mixed  
31 effects logistic regression models with random-intercepts for healthcare workers,  
32 assuming that tests were nested within healthcare workers; Second we repeated the  
33 original fixed-effects only logistic regression modelling with a subset of our dataset,  
34  
35  
36  
37  
38  
39  
40  
41  
42  
43  
44  
45  
46  
47  
48  
49  
50  
51  
52  
53  
54  
55  
56  
57  
58  
59  
60

only including data from first attempt fit tests. The results of the *post hoc* analyses were compared with our original findings and reported within the Supplementary Material. All analyses were performed in Microsoft Excel (Microsoft Corporation, Redmond, WA, USA) and R version 3.5.2 (R Foundation for Statistical Computing, Vienna, Austria). Only records with complete data for the variables modelled (gender, ethnicity, mask design, outcome of fit test) were analysed. Continuous variables are reported as mean (standard deviation [SD]) for normally- or uniformly-distributed data, or median (interquartile range [IQR]) for data with skewed distributions. For discrete variables, numbers and proportions are reported. Non-parametric data were compared with the Mann-Whitney U test, and the students t test was used for parametric data. A p value of <0.05 was considered statistically significant.

**Patient and Public Involvement:** There was no patient or public involvement in this study.

## Results

A total of 1443 healthcare workers underwent fit testing during the study period. After exclusions were applied, a total of 1182 records were available for analysis. The gender and ethnicity breakdowns for the staff members are described in Table 1.

*Table 1: Gender and ethnicity of the staff that underwent quantitative fit testing*

|                  | <i>n (%)</i><br><i>(n = 1182)</i> |
|------------------|-----------------------------------|
| <b>Gender</b>    |                                   |
| Male             | 365 (30.9%)                       |
| Female           | 817 (69.1%)                       |
| <b>Ethnicity</b> |                                   |
| White            | 557 (47.1%)                       |
| Asian            | 383 (32.4%)                       |
| Black            | 175 (14.8%)                       |
| Mixed            | 39 (3.3%)                         |
| Other            | 28 (2.4%)                         |

1  
2  
3  
4  
5 Each staff member was fit tested a median (IQR) 2 (1–3) times before a successful fit  
6 was found. Males were tested a 1 (1–2) times and females 2 (1–2) times before a  
7 successful fit was found ( $p < 0.001$ ).  
8  
9  
10  
11  
12

13  
14 There were 2359 independent quantitative fit tests modelled using logistic regression  
15 (Table 2). Values are number (proportion) or odds ratio (95%CI). To assess the  
16 possibility of non-independence between tests performed on the same healthcare  
17 worker, an additional *post hoc* mixed-effects model fitted with random-intercepts for  
18 healthcare workers did not materially change our findings (Supplementary Material,  
19 Figure A). Similarly, a post hoc fixed-effects only model fitted using only data from first  
20 fit test attempts also did not materially change our findings (Supplementary Material,  
21 Figure B).  
22  
23  
24  
25  
26  
27  
28  
29  
30  
31  
32  
33  
34

35 Male healthcare workers were significantly more likely to pass a fit test compared with  
36 females. Staff who describe their ethnicity as White were also more likely to achieve  
37 a successful fit test compared to staff who describe their ethnicity as Asian, Black,  
38 mixed, or Other (Table 3). There was wide variation in the likelihood of achieving  
39 successful mask fit between the different mask designs. The different mask designs  
40 were all N99 or FFP3 filtration, were CE marked and approved according to the  
41 European Norm EN149:2001 (Supplementary table). Mask designs demonstrated  
42 variable performance in terms of obtaining a successful fit (Table 2). Investigating the  
43 conditional probability of successful fit a first attempt by gender and ethnicity, males  
44 were generally more likely to achieve success than females ( $p < 0.001$ , Table 3).  
45  
46  
47  
48  
49  
50  
51  
52  
53  
54  
55  
56  
57  
58  
59  
60

Table 2: Logistic regression models. (D) = disposable mask; (R) = reusable mask.

| Dependent outcome:<br>Successful fit |              | Fail<br>n (%) | Pass<br>n (%) | OR (univariable)          | OR<br>(multivariable)     |
|--------------------------------------|--------------|---------------|---------------|---------------------------|---------------------------|
| Gender                               | Female       | 709 (80.8%)   | 1007 (67.9%)  | -                         | -                         |
|                                      | Male         | 168 (19.2%)   | 475 (32.1%)   | 1.99 (1.63-2.44, p<0.001) | 2.07 (1.66-2.60, p<0.001) |
| Ethnicity                            | White        | 301 (34.3%)   | 721 (48.7%)   | -                         | -                         |
|                                      | Asian        | 357 (40.7%)   | 478 (32.3%)   | 0.56 (0.46-0.68, p<0.001) | 0.47 (0.38-0.58, p<0.001) |
|                                      | Black        | 154 (17.6%)   | 198 (13.4%)   | 0.54 (0.42-0.69, p<0.001) | 0.54 (0.41-0.71, p<0.001) |
|                                      | Mixed        | 42 (4.8%)     | 51 (3.4%)     | 0.51 (0.33-0.78, p=0.002) | 0.50 (0.31-0.80, p=0.004) |
|                                      | Other        | 23 (2.6%)     | 34 (2.3%)     | 0.62 (0.36-1.08, p=0.083) | 0.53 (0.29-0.99, p=0.043) |
| RPE mask model                       | Design A (D) | 63 (7.2%)     | 307 (20.7%)   | -                         | -                         |
|                                      | Design B (D) | 9 (1.0%)      | 5 (0.3%)      | 0.11 (0.03-0.34, p<0.001) | 0.11 (0.03-0.35, p<0.001) |
|                                      | Design C (D) | 159 (18.1%)   | 84 (5.7%)     | 0.11 (0.07-0.16, p<0.001) | 0.09 (0.06-0.14, p<0.001) |
|                                      | Design D (D) | 38 (4.3%)     | 33 (2.2%)     | 0.18 (0.10-0.30, p<0.001) | 0.16 (0.09-0.27, p<0.001) |
|                                      | Design E (D) | 87 (9.9%)     | 45 (3.0%)     | 0.11 (0.07-0.17, p<0.001) | 0.10 (0.06-0.16, p<0.001) |
|                                      | Design F (D) | 47 (5.4%)     | 43 (2.9%)     | 0.19 (0.11-0.31, p<0.001) | 0.18 (0.11-0.30, p<0.001) |
|                                      | Design G (R) | 3 (0.3%)      | 6 (0.4%)      | 0.41 (0.11-1.98, p=0.216) | 0.47 (0.12-2.33, p=0.305) |
|                                      | Design H (R) | 2 (0.2%)      | 7 (0.5%)      | 0.72 (0.17-4.90, p=0.684) | 0.64 (0.14-4.50, p=0.592) |
|                                      | Design I (R) | 14 (1.6%)     | 103 (7.0%)    | 1.51 (0.83-2.91, p=0.193) | 1.70 (0.93-3.31, p=0.096) |
|                                      | Design J (R) | 214 (24.4%)   | 233 (15.7%)   | 0.22 (0.16-0.31, p<0.001) | 0.24 (0.17-0.34, p<0.001) |
|                                      | Design K (R) | 86 (9.8%)     | 394 (26.6%)   | 0.94 (0.66-1.34, p=0.735) | 0.97 (0.67-1.39, p=0.863) |
|                                      | Design L (R) | 152 (17.3%)   | 218 (14.7%)   | 0.29 (0.21-0.41, p<0.001) | 0.29 (0.21-0.41, p<0.001) |
|                                      | Others       | 3 (0.3%)      | 4 (0.3%)      | 0.27 (0.06-1.42, p=0.095) | 0.29 (0.06-1.51, p=0.112) |

Table 3: Conditional probabilities of successful first attempt fit by gender and ethnicity. Values are number or proportion.

| Gender | Ethnicity | Failed first fit attempt (n) | Passed first fit attempt (n) | Probability of passing first fit attempt (%) |
|--------|-----------|------------------------------|------------------------------|----------------------------------------------|
| F      | White     | 206                          | 163                          | 44.2%                                        |
|        | Asian     | 164                          | 97                           | 37.2%                                        |
|        | Black     | 78                           | 65                           | 45.5%                                        |
|        | Mixed     | 23                           | 9                            | 28.1%                                        |
|        | Other     | 7                            | 5                            | 58.3%                                        |
| M      | White     | 80                           | 108                          | 57.4%                                        |
|        | Asian     | 66                           | 56                           | 45.9%                                        |
|        | Black     | 15                           | 17                           | 53.1%                                        |
|        | Mixed     | 3                            | 4                            | 57.1%                                        |
|        | Other     | 9                            | 7                            | 43.8%                                        |

## Discussion

We investigated the suitability of respirators worn by healthcare workers and report new evidence that indicates lower RPE fit testing success rates among BAME and female healthcare workers.[3,4] This may indicate that certain groups may be at particular risk from Covid-19 infection in the workplace due to unsuitable respiratory protection.

The demographic diversity in our data may differ to the NHS England workforce. However, it is not dissimilar to the demographics expected of a healthcare facility in central London and so it is representative of London healthcare workers. BAME healthcare workers may account for 19.8% of the NHS workforce in England but ethnic minority healthcare workers demonstrate a higher representation in London (44.9%) with 1.7% identifying as having a mixed ethnic background.[14] Failure of RPE to protect BAME healthcare workers affects a significant proportion of the NHS workforce.

Our data suggest that there could be biases in design and certification of respirators. Respirator design has historically focused on the fit for individuals from the US Air Force in the 1967-68.[10,15] However, it is unclear if the anthropometric data collected was even representative of the workforce in the 1960s and 70s as the US Air Force had clear height and weight restrictions, and consisted mainly of men.[15] Population demographics have changed drastically in the UK and US since the 1960s, with increased numbers of women and people from ethnic minorities in all workplaces. This historical data is therefore unlikely to reflect current workforce demographics. [6,15,14]

1  
2  
3  
4 Recognising that the standard fit panels may no longer be appropriate, the National  
5 Institute for Occupational Safety and Health (NIOSH) conducted a new survey of the  
6 US work force in 2001.[16] 4026 subjects from 41 different sites in, eight states were  
7 recruited, and new fit moulding panels were proposed based on the anthropometric  
8 data collected.[16] However, the ethnic groups described in this study differ from the  
9 UK. The demographics of the workforce describes one third of the population as  
10 Hispanic and specifically categorises the ethnicities as White, African American,  
11 Hispanic and Other.[15,16] However, the largest ethnic group after White British in  
12 England and Wales is “White other”, followed by Asian – Indian, Asian – Pakistani,  
13 Black – African and Asian other.[12] Although NIOSH suggest their data can be used  
14 as a starting point for design and certification as the US population is ethnically  
15 diverse, the US data may not map accurately to the ethnic makeup of the UK  
16 healthcare workforce. Every individual has different features which vary by gender,  
17 ethnicity and even occupational role.[17] Face length is a key feature in respirator fit  
18 and this has been shown to vary significantly across ethnic and gender groups.[17]  
19 For example, anthropometric data shows statistically significant differences in width  
20 and face and lip length between African Americans and White Americans.[17] A  
21 sample of African Americans and Hispanic individuals in the US workforce were found  
22 to have up to face lengths 2.7 and 2.8 mm longer than White Americans.[17] Prior to  
23 Covid-19 most respirators were used in industrial applications such as construction.  
24 Construction workers are more likely to be male than healthcare staff, and have  
25 different facial features, including longer noses.[17] Gender has also been shown to  
26 be a major determinant in facial differences and measurements. Nine out of 10 facial  
27 measurements vary by gender with the female face being significantly smaller than  
28  
29  
30  
31  
32  
33  
34  
35  
36  
37  
38  
39  
40  
41  
42  
43  
44  
45  
46  
47  
48  
49  
50  
51  
52  
53  
54  
55  
56  
57  
58  
59  
60



1  
2  
3 the male face.[17] This is of relevance to respirator fit in healthcare workers as 77%  
4  
5 of the NHS workforce is female.  
6  
7  
8  
9

10 Future respirator design should consider the facial characteristics of the demographic  
11  
12 of the workforce. Face panels consisting of a true representation of female and BAME  
13  
14 healthcare workers could help improve respirator design and improve safety when  
15  
16 caring for Covid-19 patients. Out-dated fit panels used in the design and certification  
17  
18 of the respirators demonstrate the institutional gender and racial biases in respirator  
19  
20 fit and must be addressed in order to protect BAME and female staff.  
21  
22  
23  
24  
25

26 Use of facial anthropometric data representing the current demographics of the  
27  
28 workforce is not only important in the design of RPE, it can be used to guide  
29  
30 procurement strategies for the ongoing pandemic. For example, females have on  
31  
32 average smaller faces so looking at the different proportions of female versus male  
33  
34 healthcare workers can guide what proportion of the procured respirators should be  
35  
36 smaller versus large.  
37  
38  
39  
40  
41

42 Examining the shape and measurements of the respirator in comparison to a face  
43  
44 panel representing the workforce could help decision making in procurement. These  
45  
46 techniques using facial anthropometric data representative of the workforce and  
47  
48 observing the success or fail rate of different respirator designs in each ethnic or  
49  
50 gender group could help with the decision-making process of which respirators to  
51  
52 stock. Guiding procurement processes can prevent excesses of poorly sized  
53  
54 respirators and shortages of the correct sizes.  
55  
56  
57  
58  
59  
60

1  
2  
3 However, even if the correct respirator for the demographic of the workforce was  
4 sourced, supply and demand issues of RPE early in the Covid-19 pandemic meant  
5 healthcare facilities could not rely upon a steady supply of any single preferred  
6 respirator. Every respirator has a different design and fit, therefore individuals should  
7 be fit tested on the respirator model they don prior to patient interactions.[8,13] The  
8 multiple changes in respirator models mean healthcare workers must be repeatedly fit  
9 tested on the new models as supplies change. As healthcare facilities were  
10 overwhelmed with the need to fit test staff repeatedly on different masks many adopted  
11 an approach to fit check only.[9] Our data demonstrates that respirators have a  
12 variable success rate on initial fit test. For example, Design J did not suitably fit 24.4%  
13 of our staff. Some studies have demonstrated a fail rate as high as 78% when a  
14 respirator is used without fit testing.[10] Failure to fit test may leave a significant  
15 proportion of staff inadequately protected against Covid-19 and according to our data  
16 it is mixed ethnicity and Asian female healthcare workers who are at greatest risk.

### 36 **Limitations**

37  
38  
39 This was a single centre study. The demographics of our data is representative of  
40 healthcare facilities in the London however further data should be collected to  
41 extrapolate the results to other areas. A large number of respirators were observed  
42 in this study and each individual did not test on every model. More data are required  
43 to evaluate the efficacy of each model. Finally, previous experience with fit-testing  
44 was not accounted for, although quantitative fit-testing is objective and independent  
45 of experience, and the use of respirators was generally poor prior to the pandemic so  
46 we assumed a homogeneous lack of experience in our cohort.  
47  
48  
49  
50  
51  
52  
53  
54  
55  
56  
57  
58  
59  
60

## Conclusion

Respirator design and certification may be biased towards fitting a demographic that is not reflective of the current healthcare workforce. This could leave many healthcare workers vulnerable as they struggle to fit into a mask not designed for their faces. Lack of design consideration and supply issues could be a dangerous combination for healthcare staff as they rely upon the protection of a properly fitted respirator to reduce the risk of infection transmission whilst caring for patients with Covid-19.

Further research into the design and fit of respiratory protective equipment must consider the demographic of the healthcare workforce as we cannot rely on anthropometric data that represents only one section of the workforce. Creating new fit panels that accurately represent female workers and the ethnically diverse healthcare workforce is an essential first step towards designing well-fitting respirators. In the meantime, it is important to recognise that no one mask will fit all staff. [8-11,13] Therefore the focus should be on employers stocking a suite of RPE, so that a diverse workforce has the best chance of finding a respirator of appropriate fit.

Ensuring fit-testing and keeping adequate stock of a variety of respirator models can help maintain the safety of the whole workforce but future research should focus on the design of respirators for BAME and female healthcare workers.

## References

1. Livingston E, Desai A, Berkwits M. Sourcing Personal Protective Equipment During the COVID-19 pandemic. *JAMA* 2020; 323:1912-1914
2. Public Health England. Guidance - Covid-19 Personal Protective Equipment 2020 <https://www.gov.uk/government/publications/wuhan-novel-coronavirus-infection-prevention-and-control/covid-19-personal-protective-equipment-ppe>
3. The Lancet. Editorial - COVID-19: Protecting health-care workers. March 2020.  
<http://www.sciencedirect.com/science/article/pii/S0140673620306449>
4. El-Boghdadly K, Wong DJN, Owen R, et al. Risks to healthcare workers following tracheal intubation of patients with COVID-19: a prospective international multicentre cohort study. *Anaesthesia* June 2020; 75: 1437-1447
5. Cook T, Kursumovic E, Lennane S. Exclusive: Deaths of NHS Staff from COVID-19 analysed. April 2020 <https://www.hsj.co.uk/exclusive-deaths-of-nhs-staff-from-covid-19-analysed/7027471.article>

- 1  
2  
3 6. Amnesty International. UK among the highest COVID-19 healthcare  
4 worker deaths in the world 2020. [https://www.amnesty.org.uk/press-](https://www.amnesty.org.uk/press-releases/uk-among-highest-covid-19-health-worker-deaths-world)  
5  
6 releases/uk-among-highest-covid-19-health-worker-deaths-world  
7  
8  
9
- 10  
11  
12 7. British Medical Association. BMA survey reveals almost half of doctors  
13 have relied upon donated or self-bought PPE and two thirds still don't feel  
14 fully protected 2020. [https://www.bma.org.uk/bma-media-centre/bma-](https://www.bma.org.uk/bma-media-centre/bma-survey-reveals-almost-half-of-doctors-have-relied-upon-donated-or-self-bought-ppe-and-two-thirds-still-don-t-feel-fully-protected)  
15 survey-reveals-almost-half-of-doctors-have-relied-upon-donated-or-self-  
16 bought-ppe-and-two-thirds-still-don-t-feel-fully-protected  
17  
18  
19  
20  
21  
22  
23
- 24  
25  
26 8. Health and Safety Executive. Fit Testing Face Masks to Avoid  
27 Transmission during the coronavirus outbreak. 2020.  
28  
29  
30  
31  
32  
33  
34  
35  
36  
37  
38  
39  
40  
41  
42  
43  
44  
45  
46  
47  
48  
49  
50  
51  
52  
53  
54  
55  
56  
57  
58  
59  
60
9. The Guardian. Hospitals Accused of Risking Staff Lives by Abandoning  
PPE Fit Tests. March 2020.  
[https://www.theguardian.com/world/2020/apr/14/nhs-hospitals-accused-](https://www.theguardian.com/world/2020/apr/14/nhs-hospitals-accused-of-risking-staff-lives-by-abandoning-ppe-fit-tests-coronavirus)  
of-risking-staff-lives-by-abandoning-ppe-fit-tests-coronavirus
10. Manganyi J, Wilson K, Rees D. Quantitative respirator fit, face sizes and  
determinants of fit in South African diagnostic laboratory respirator users.  
Annals of Work Exposures and Health Nov 2017; 61;9:1154-1162

- 1  
2  
3 11. Oestenstad R, Elliot L, Beasley T. The effect of gender and respirator  
4 brand on the association of respirator fit with facial dimensions. Journal of  
5 Occupational and Environmental Hygiene Dec 2007;4 923-930  
6  
7  
8  
9  
10  
11  
12 12. UK Census 2011. Ethnicity Facts and Figures [https://www.ethnicity-facts-](https://www.ethnicity-facts-figures.service.gov.uk/)  
13 [figures.service.gov.uk/](https://www.ethnicity-facts-figures.service.gov.uk/)  
14  
15  
16  
17  
18  
19 13. Health and Safety Executive. Guidance on respiratory protective  
20 equipment (RPE) fit testing 2019. [https://www.hse.gov.uk/respiratory-](https://www.hse.gov.uk/respiratory-protective-equipment/)  
21 [protective-equipment/](https://www.hse.gov.uk/respiratory-protective-equipment/)  
22  
23  
24  
25  
26  
27  
28 14. NHS England. NHS Workforce Race and Equality Standard Report 2019.  
29 [https://www.england.nhs.uk/wp-content/uploads/2020/01/wre-2019-data-](https://www.england.nhs.uk/wp-content/uploads/2020/01/wre-2019-data-report.pdf)  
30 [report.pdf](https://www.england.nhs.uk/wp-content/uploads/2020/01/wre-2019-data-report.pdf)  
31  
32  
33  
34  
35  
36  
37 15. Bailar J, Meyer E, Pool R. Institute of Medicine: Assessment of the  
38 NIOSH head-and-face anthropometric survey of US respirator users.  
39 2007 pp1-108  
40  
41  
42  
43  
44  
45  
46  
47 16. American Industrial Hygiene Association. Respirator Fit Testing Methods  
48 2010 ISBN 978-1-935082-24-8  
49  
50  
51  
52  
53  
54  
55 17. Zhuang Z, Landsittel D, Benson S et al. Facial Anthropometric  
56 differences among gender, ethnicity and age groups. Annals of  
57 Occupational Hygiene Jun 2010; 54(4):391-402  
58  
59  
60

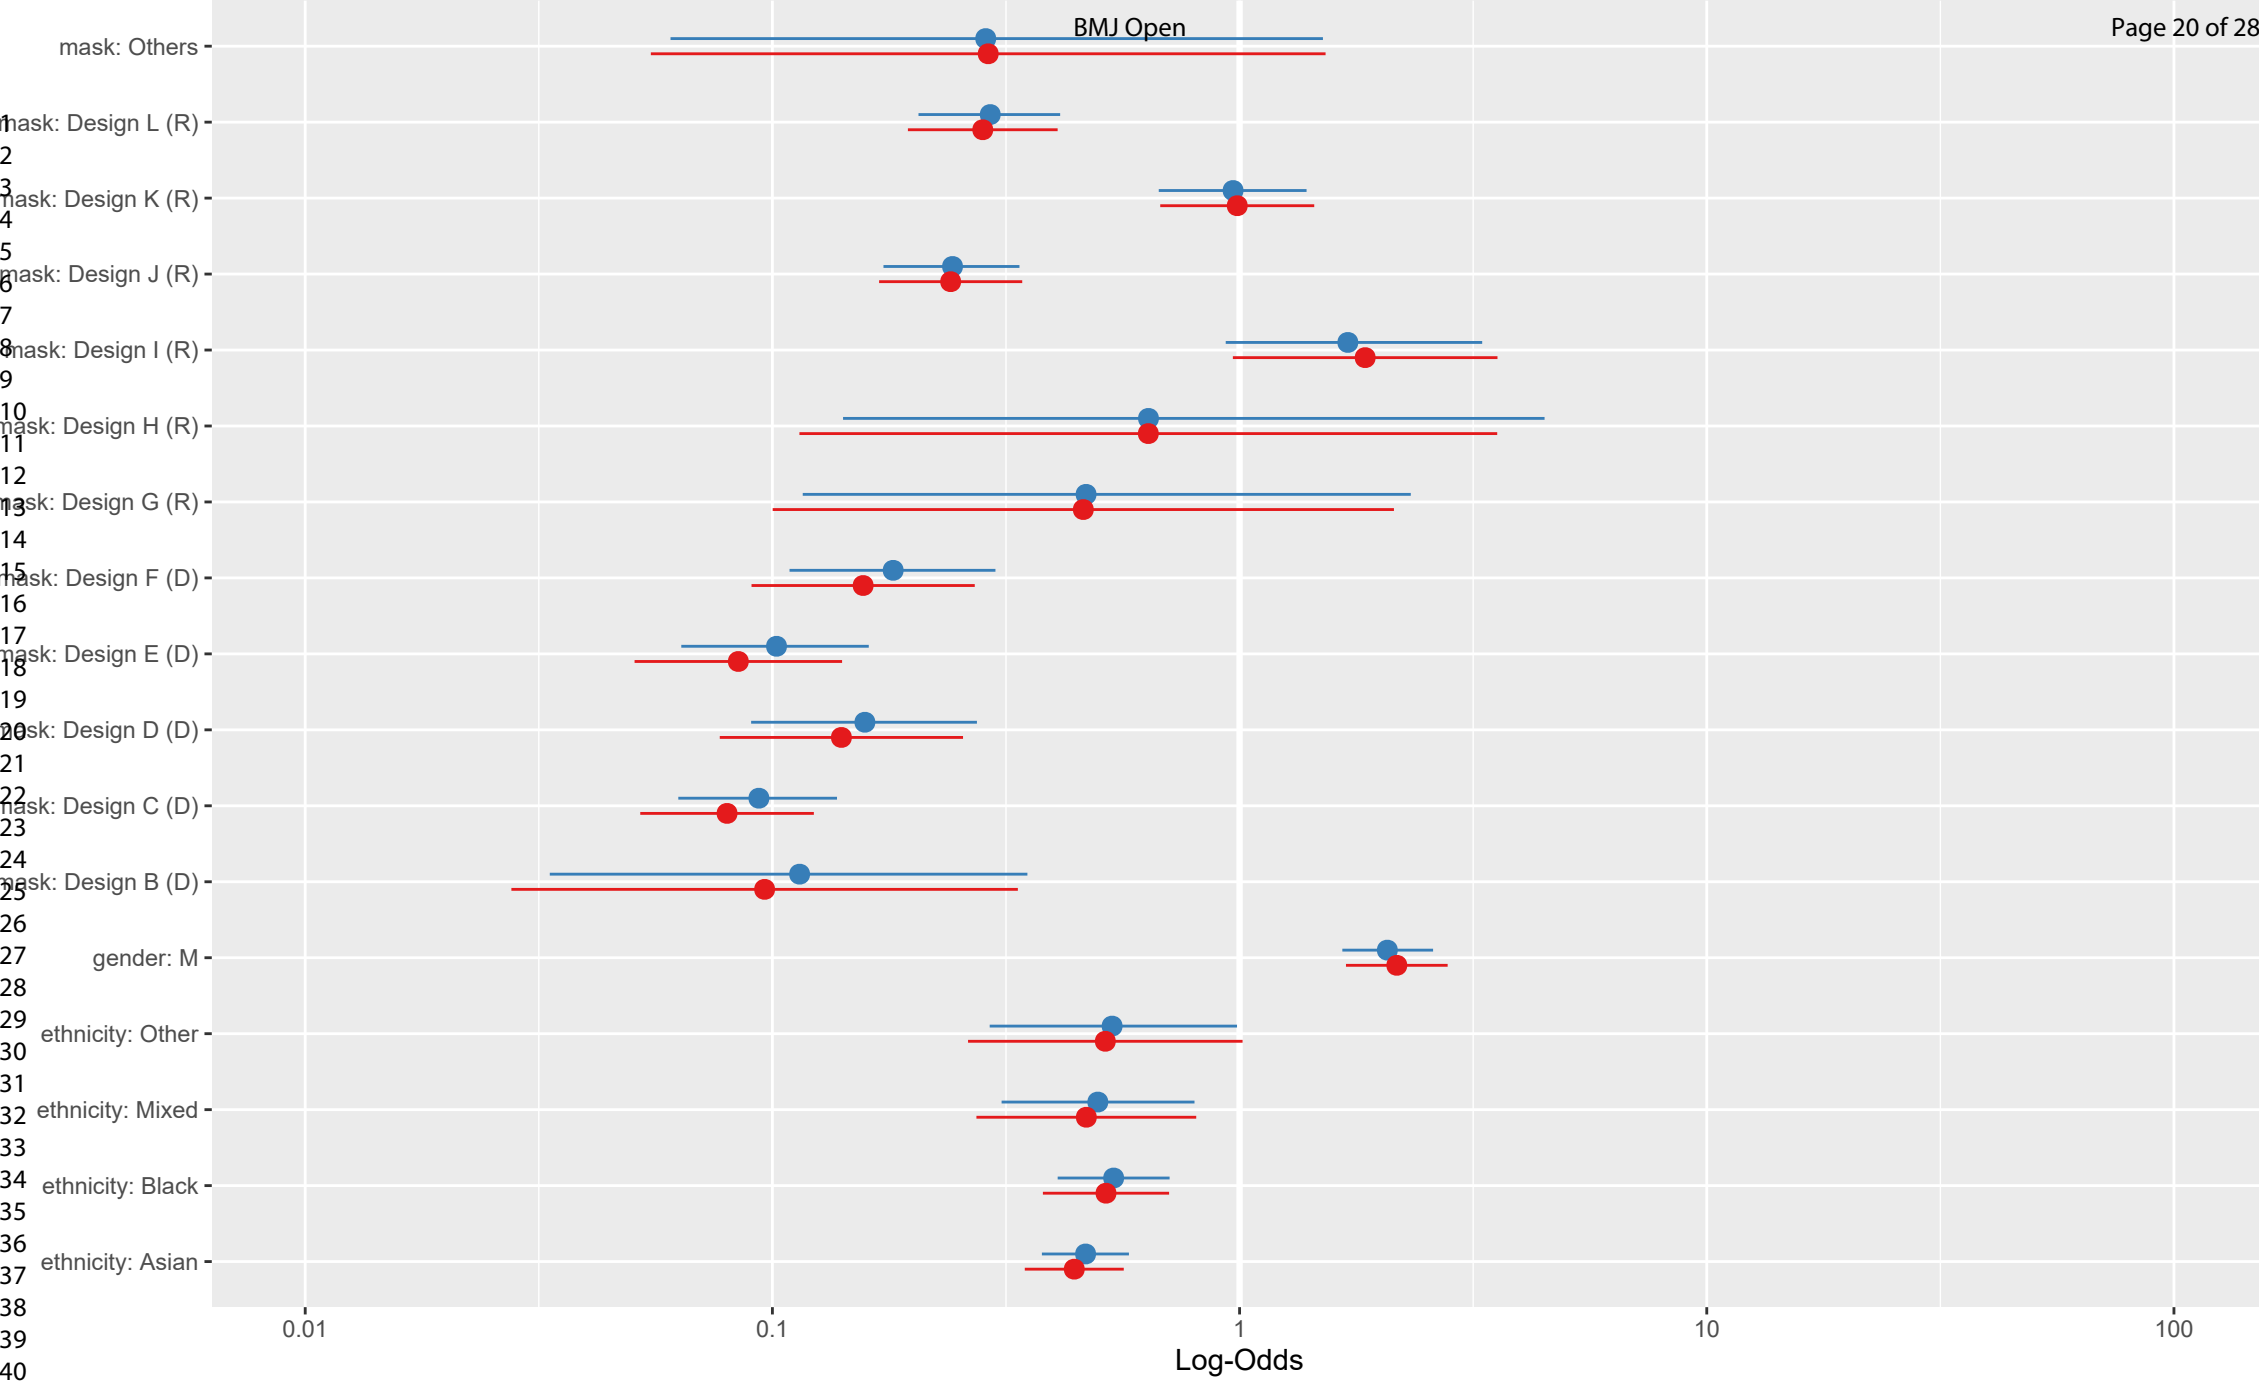

For peer review only - <http://bmjopen.bmj.com/site/about/guidelines.xhtml>

Model 1 (fixed effects only) Model 2 (mixed effects with random intercept for HCW)

mask: Others

mask: Design L (R)

mask: Design K (R)

mask: Design J (R)

mask: Design I (R)

mask: Design H (R)

mask: Design G (R)

mask: Design F (D)

mask: Design E (D)

mask: Design D (D)

mask: Design C (D)

mask: Design B (D)

gender: M

ethnicity: Other

ethnicity: Mixed

ethnicity: Black

ethnicity: Asian

### BMJ Open

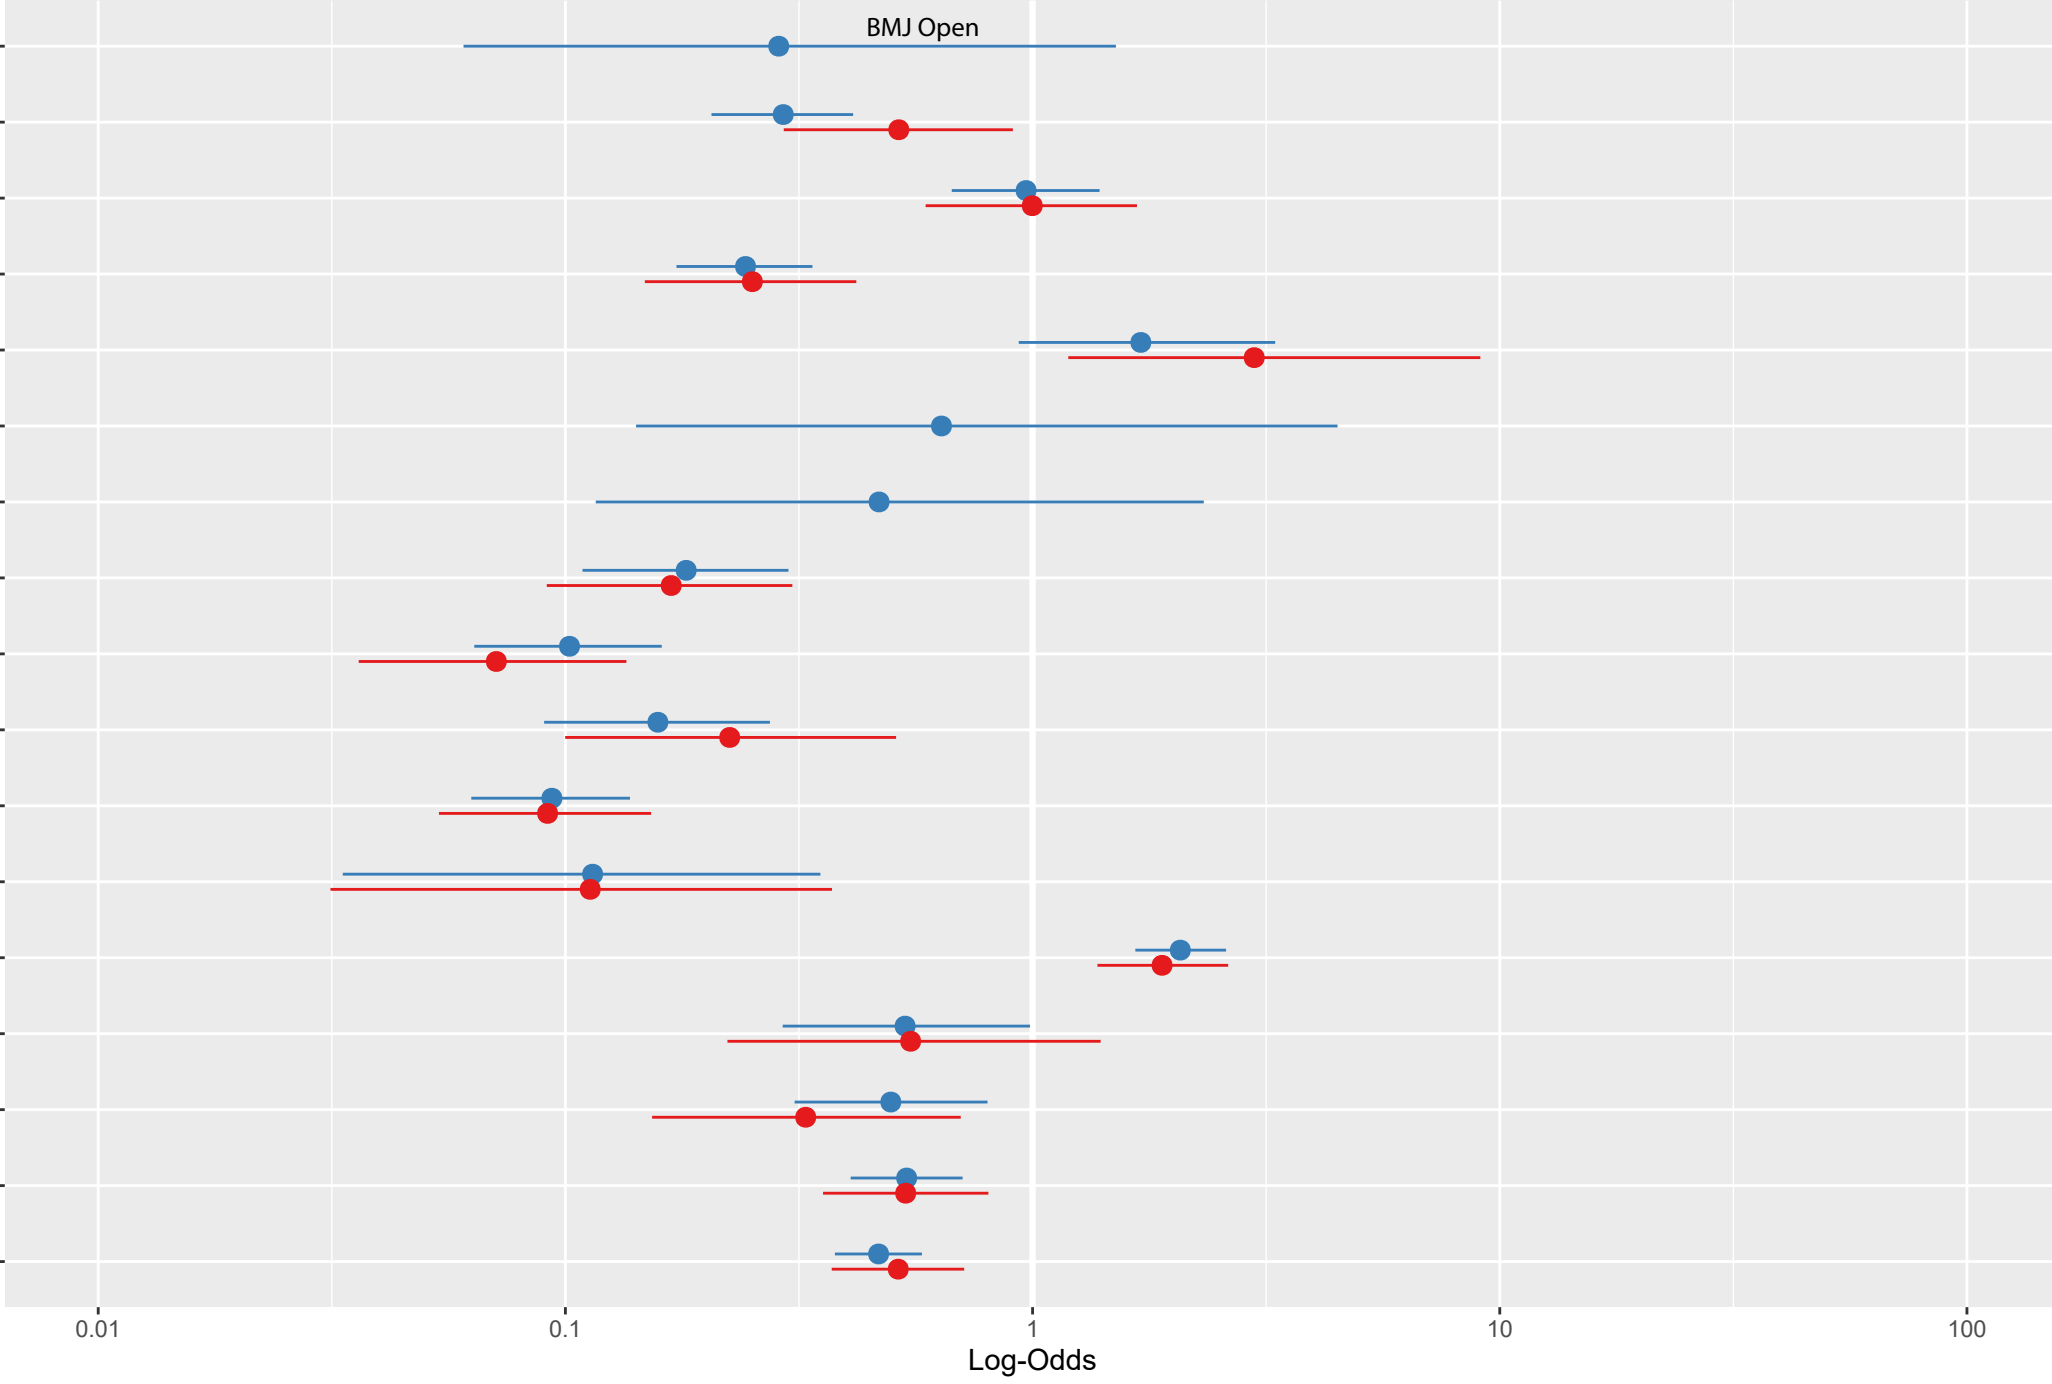



## Supplementary Material

*Supplementary Table: Description of Different Masks Used*

| <i>Mask Design</i> | <i>Manufacturer</i> | <i>Model</i>        | <i>Shape</i>     | <i>Expiratory Filter Y/N</i> | <i>Reusable (R) / Disposable (D)</i> | <i>Grade of mask</i>  |
|--------------------|---------------------|---------------------|------------------|------------------------------|--------------------------------------|-----------------------|
| A                  | Full Support Group  | Easimask FSM18      | Cup              | N                            | D                                    | FFP3 / N99 equivalent |
| B                  | Full Support Group  | Easimask FSM16      | Duckbill         | N                            | D                                    | FFP3 / N99 equivalent |
| C                  | 3M                  | 1863                | Fold out 3 Panel | N                            | D                                    | FFP3 / N99 equivalent |
| D                  | 3M                  | 8833                | Cup              | Y                            | D                                    | FFP3 / N99 equivalent |
| E                  | 3M                  | 1873                | Fold out 3 Panel | Y                            | D                                    | FFP3 / N99 equivalent |
| F                  | 3M                  | Aura 1863+          | Fold out 3 Panel | N                            | D                                    | FFP3 / N99 equivalent |
| G                  | 3M                  | 6500 +P3 Filter     | Half mask        | Y                            | R                                    | FFP3 / N99 equivalent |
| H                  | 3M                  | 7500 +P3 Filter     | Half mask        | Y                            | R                                    | FFP3 / N99 equivalent |
| I                  | Scott Safety        | Aviva 50 +P3 Filter | Half mask        | Y                            | R                                    | FFP3 / N99 equivalent |
| J                  | JSP Safety          | Force 8 +P3 Filter  | Half mask        | Y                            | R                                    | FFP3 / N99 equivalent |
| K                  | Sundstrom           | SR100 +P3 Filter    | Half mask        | Y                            | R                                    | FFP3 / N99 equivalent |
| L                  | PureFlo             | PF1000 +P3 Filter   | Half mask        | Y                            | R                                    | FFP3 / N99 equivalent |

Figure A

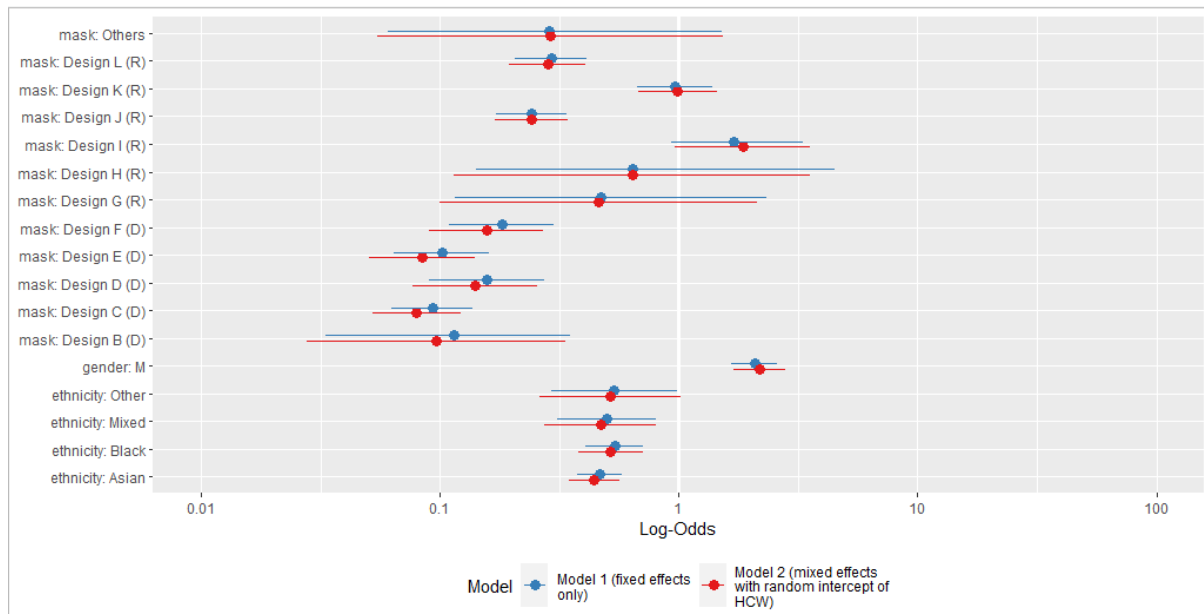

Figure A: Forest plot comparing the fixed effects point estimates and 95% confidence intervals the original model in the manuscript (Model 1) compared to a revised model fitted using mixed effects logistic regression with a random intercept for HCW (Model 2).

Figure B

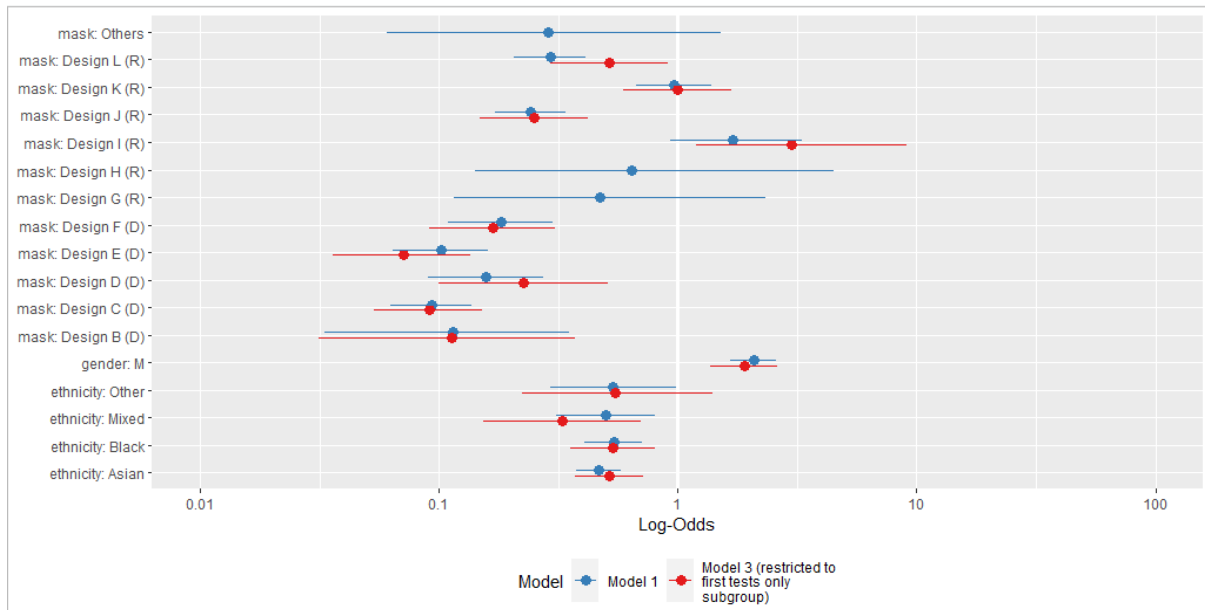

Figure B: Forest plot comparing the fixed effects point estimates and 95% confidence intervals the original model in the manuscript (Model 1) compared to a revised model fitted using only subgroup data from first fit

**Revised Standards for Quality Improvement Reporting Excellence (SQUIRE 2.0)  
September 15, 2015**

| Text Section and Item Name                    | Section or Item Description                                                                                                                                                                                                                                                                                                                                                                                                                                                                                                                                                                                                                                                                                                                                                                                                                                                                                                                                                                                                             |
|-----------------------------------------------|-----------------------------------------------------------------------------------------------------------------------------------------------------------------------------------------------------------------------------------------------------------------------------------------------------------------------------------------------------------------------------------------------------------------------------------------------------------------------------------------------------------------------------------------------------------------------------------------------------------------------------------------------------------------------------------------------------------------------------------------------------------------------------------------------------------------------------------------------------------------------------------------------------------------------------------------------------------------------------------------------------------------------------------------|
| <b>Notes to authors</b>                       | <ul style="list-style-type: none"> <li>• The SQUIRE guidelines provide a framework for reporting new knowledge about how to improve healthcare</li> <li>• The SQUIRE guidelines are intended for reports that describe <a href="#">system</a> level work to improve the quality, safety, and value of healthcare, and used methods to establish that observed outcomes were due to the <a href="#">intervention(s)</a>.</li> <li>• A range of approaches exists for improving healthcare. SQUIRE may be adapted for reporting any of these.</li> <li>• Authors should consider every SQUIRE item, but it may be inappropriate or unnecessary to include every SQUIRE element in a particular manuscript.</li> <li>• The SQUIRE Glossary contains definitions of many of the key words in SQUIRE.</li> <li>• The Explanation and Elaboration document provides specific examples of well-written SQUIRE items, and an in-depth explanation of each item.</li> <li>• Please cite SQUIRE when it is used to write a manuscript.</li> </ul> |
| <b>Title and Abstract</b>                     |                                                                                                                                                                                                                                                                                                                                                                                                                                                                                                                                                                                                                                                                                                                                                                                                                                                                                                                                                                                                                                         |
| <b>1. Title</b>                               | Indicate that the manuscript concerns an <a href="#">initiative</a> to improve healthcare (broadly defined to include the quality, safety, effectiveness, patient-centeredness, timeliness, cost, efficiency, and equity of healthcare) ✓                                                                                                                                                                                                                                                                                                                                                                                                                                                                                                                                                                                                                                                                                                                                                                                               |
| <b>2. Abstract</b>                            | <ol style="list-style-type: none"> <li>a. Provide adequate information to aid in searching and indexing</li> <li>b. Summarize all key information from various sections of the text using the abstract format of the intended publication or a structured summary such as: background, local <a href="#">problem</a>, methods, interventions, results, conclusions</li> </ol>                                                                                                                                                                                                                                                                                                                                                                                                                                                                                                                                                                                                                                                           |
| <b>Introduction</b>                           | <i>Why did you start?</i>                                                                                                                                                                                                                                                                                                                                                                                                                                                                                                                                                                                                                                                                                                                                                                                                                                                                                                                                                                                                               |
| <b>3. <a href="#">Problem Description</a></b> | Nature and significance of the local <a href="#">problem</a> ✓                                                                                                                                                                                                                                                                                                                                                                                                                                                                                                                                                                                                                                                                                                                                                                                                                                                                                                                                                                          |
| <b>4. Available knowledge</b>                 | Summary of what is currently known about the <a href="#">problem</a> , including relevant previous studies ✓                                                                                                                                                                                                                                                                                                                                                                                                                                                                                                                                                                                                                                                                                                                                                                                                                                                                                                                            |

|                                        |                                                                                                                                                                                                                                                                                                                                                                                                                                                                                                                                                                                                                                              |   |
|----------------------------------------|----------------------------------------------------------------------------------------------------------------------------------------------------------------------------------------------------------------------------------------------------------------------------------------------------------------------------------------------------------------------------------------------------------------------------------------------------------------------------------------------------------------------------------------------------------------------------------------------------------------------------------------------|---|
| 5. <b><u>Rationale</u></b>             | Informal or formal frameworks, models, concepts, and/or <a href="#">theories</a> used to explain the <a href="#">problem</a> , any reasons or <a href="#">assumptions</a> that were used to develop the <a href="#">intervention(s)</a> , and reasons why the <a href="#">intervention(s)</a> was expected to work                                                                                                                                                                                                                                                                                                                           | ✓ |
| 6. <b>Specific aims</b>                | Purpose of the project and of this report                                                                                                                                                                                                                                                                                                                                                                                                                                                                                                                                                                                                    | ✓ |
| <b>Methods</b>                         | <i>What did you do?</i>                                                                                                                                                                                                                                                                                                                                                                                                                                                                                                                                                                                                                      |   |
| 7. <b><u>Context</u></b>               | Contextual elements considered important at the outset of introducing the <a href="#">intervention(s)</a>                                                                                                                                                                                                                                                                                                                                                                                                                                                                                                                                    | ✓ |
| 8. <b><u>Intervention(s)</u></b>       | a. Description of the <a href="#">intervention(s)</a> in sufficient detail that others could reproduce it<br>b. Specifics of the team involved in the work                                                                                                                                                                                                                                                                                                                                                                                                                                                                                   |   |
| 9. <b>Study of the Intervention(s)</b> | a. Approach chosen for assessing the impact of the <a href="#">intervention(s)</a><br>b. Approach used to establish whether the observed outcomes were due to the <a href="#">intervention(s)</a>                                                                                                                                                                                                                                                                                                                                                                                                                                            |   |
| 10. <b>Measures</b>                    | a. Measures chosen for studying <a href="#">processes</a> and outcomes of the <a href="#">intervention(s)</a> , including rationale for choosing them, their operational definitions, and their validity and reliability<br>b. Description of the approach to the ongoing assessment of contextual elements that contributed to the success, failure, efficiency, and cost<br>c. Methods employed for assessing completeness and accuracy of data                                                                                                                                                                                            | ✓ |
| 11. <b>Analysis</b>                    | a. Qualitative and quantitative methods used to draw <a href="#">inferences</a> from the data<br>b. Methods for understanding variation within the data, including the effects of time as a variable                                                                                                                                                                                                                                                                                                                                                                                                                                         | ✓ |
| 12. <b>Ethical Considerations</b>      | <a href="#">Ethical aspects</a> of implementing and studying the <a href="#">intervention(s)</a> and how they were addressed, including, but not limited to, formal ethics review and potential conflict(s) of interest                                                                                                                                                                                                                                                                                                                                                                                                                      | ✓ |
| <b>Results</b>                         | <i>What did you find?</i>                                                                                                                                                                                                                                                                                                                                                                                                                                                                                                                                                                                                                    |   |
| 13. <b>Results</b>                     | a. Initial steps of the <a href="#">intervention(s)</a> and their evolution over time (e.g., time-line diagram, flow chart, or table), including modifications made to the intervention during the project<br>b. Details of the <a href="#">process</a> measures and outcome<br>c. Contextual elements that interacted with the <a href="#">intervention(s)</a><br>d. Observed associations between outcomes, interventions, and relevant contextual elements<br>e. Unintended consequences such as unexpected benefits, problems, failures, or costs associated with the <a href="#">intervention(s)</a> .<br>f. Details about missing data | ✓ |
| <b>Discussion</b>                      | <i>What does it mean?</i>                                                                                                                                                                                                                                                                                                                                                                                                                                                                                                                                                                                                                    |   |
| 14. <b>Summary</b>                     | a. Key findings, including relevance to the <a href="#">rationale</a> and specific aims<br>b. Particular strengths of the project                                                                                                                                                                                                                                                                                                                                                                                                                                                                                                            | ✓ |

|                                                                                                         |                                                                                                                                                                                                                                                                                                                                                                                                                                                                                                                                                            |
|---------------------------------------------------------------------------------------------------------|------------------------------------------------------------------------------------------------------------------------------------------------------------------------------------------------------------------------------------------------------------------------------------------------------------------------------------------------------------------------------------------------------------------------------------------------------------------------------------------------------------------------------------------------------------|
| <p>1<br/>2<br/>3<br/>4<br/>5<br/>6<br/>7<br/>8<br/>9<br/>10<br/>11</p> <p><b>15. Interpretation</b></p> | <p>a. Nature of the association between the <a href="#">intervention(s)</a> and the outcomes</p> <p>b. Comparison of results with findings from other publications</p> <p>c. Impact of the project on people and <a href="#">systems</a></p> <p>d. Reasons for any differences between observed and anticipated outcomes, including the influence of <a href="#">context</a></p> <p>e. Costs and strategic trade-offs, including <a href="#">opportunity costs</a></p>  |
| <p>12<br/>13<br/>14<br/>15<br/>16</p> <p><b>16. Limitations</b></p>                                     | <p>a. Limits to the <a href="#">generalizability</a> of the work</p> <p>b. Factors that might have limited <a href="#">internal validity</a> such as confounding, bias, or imprecision in the design, methods, measurement, or analysis</p> <p>c. Efforts made to minimize and adjust for limitations</p>                                                                                                                                                               |
| <p>17<br/>18<br/>19<br/>20<br/>21<br/>22</p> <p><b>17. Conclusions</b></p>                              | <p>a. Usefulness of the work</p> <p>b. Sustainability</p> <p>c. Potential for spread to other <a href="#">contexts</a></p> <p>d. Implications for practice and for further study in the field</p> <p>e. Suggested next steps</p>                                                                                                                                                                                                                                        |
| <p>23<br/>24</p> <p><b>Other information</b></p>                                                        |                                                                                                                                                                                                                                                                                                                                                                                                                                                                                                                                                            |
| <p>25<br/>26<br/>27</p> <p><b>18. Funding</b></p>                                                       | <p>Sources of funding that supported this work. Role, if any, of the funding organization in the design, implementation, interpretation, and reporting</p>                                                                                                                                                                                                                                                                                                              |

1  
2  
3 **Table 2. Glossary of key terms used in SQUIRE 2.0. This Glossary provides the intended**  
4 **meaning of selected words and phrases as they are used in the SQUIRE 2.0 Guidelines. They**  
5 **may, and often do, have different meanings in other disciplines, situations, and settings.**  
6

### 7 **Assumptions**

8 Reasons for choosing the activities and tools used to bring about changes in healthcare services at  
9 the [system](#) level.  
10  
11

### 12 **Context**

13 Physical and sociocultural makeup of the local environment (for example, external environmental  
14 factors, organizational dynamics, collaboration, resources, leadership, and the like), and the  
15 interpretation of these factors (“sense-making”) by the healthcare delivery professionals, patients,  
16 and caregivers that can affect the effectiveness and [generalizability](#) of [intervention\(s\)](#).  
17  
18

### 19 **Ethical aspects**

20 The value of [system](#)-level [initiatives](#) relative to their potential for harm, burden, and cost to the  
21 stakeholders. Potential harms particularly associated with efforts to improve the quality, safety, and  
22 value of healthcare services include [opportunity costs](#), invasion of privacy, and staff distress  
23 resulting from disclosure of poor performance.  
24  
25

### 26 **Generalizability**

27 The likelihood that the [intervention\(s\)](#) in a particular report would produce similar results in other  
28 settings, situations, or environments (also referred to as external validity).  
29  
30

### 31 **Healthcare improvement**

32 Any systematic effort intended to raise the quality, safety, and value of healthcare services, usually  
33 done at the [system](#) level. We encourage the use of this phrase rather than “quality improvement,”  
34 which often refers to more narrowly defined approaches.  
35  
36

### 37 **Inferences**

38 The meaning of findings or data, as interpreted by the stakeholders in healthcare services –  
39 improvers, healthcare delivery professionals, and/or patients and families  
40  
41

### 42 **Initiative**

43 A broad term that can refer to organization-wide programs, narrowly focused projects, or the details  
44 of specific interventions (for example, planning, execution, and assessment)  
45  
46

### 47 **Internal validity**

48 Demonstrable, credible evidence for efficacy (meaningful impact or change) resulting from  
49 introduction of a specific intervention into a particular healthcare [system](#).  
50  
51

### 52 **Intervention(s)**

53 The specific activities and tools introduced into a healthcare [system](#) with the aim of changing its  
54 performance for the better. Complete description of an intervention includes its inputs, internal  
55 activities, and outputs (in the form of a logic model, for example), and the mechanism(s) by which  
56 these components are expected to produce changes in a [system's](#) performance.  
57  
58

### 59 **Opportunity costs**

1  
2  
3 Loss of the ability to perform other tasks or meet other responsibilities resulting from the diversion  
4 of resources needed to introduce, test, or sustain a particular [improvement](#) initiative  
5  
6

### 7 **Problem**

8 Meaningful disruption, failure, inadequacy, distress, confusion or other dysfunction in a healthcare  
9 service delivery [system](#) that adversely affects patients, staff, or the [system](#) as a whole, or that  
10 prevents care from reaching its full potential  
11

### 12 **Process**

13 The routines and other activities through which healthcare services are delivered  
14  
15

### 16 **Rationale**

17 Explanation of why particular [intervention\(s\)](#) were chosen and why it was expected to work, be  
18 sustainable, and be replicable elsewhere.  
19

### 20 **Systems**

21 The interrelated structures, people, [processes](#), and activities that together create healthcare services  
22 for and with individual patients and populations. For example, systems exist from the personal self-  
23 care system of a patient, to the individual provider-patient dyad system, to the microsystem, to the  
24 macrosystem, and all the way to the market/social/insurance system. These levels are nested within  
25 each other.  
26  
27

### 28 **Theory or theories**

29 Any “reason-giving” account that asserts causal relationships between variables (causal theory) or  
30 that makes sense of an otherwise obscure [process](#) or situation (explanatory theory). Theories come  
31 in many forms, and serve different purposes in the phases of [improvement](#) work. It is important to  
32 be explicit and well-founded about any informal and formal theory (or theories) that are used.  
33  
34  
35  
36  
37  
38  
39  
40  
41  
42  
43  
44  
45  
46  
47  
48  
49  
50  
51  
52  
53  
54  
55  
56  
57  
58  
59  
60



# BMJ Open

## A prospective observational study of gender and ethnicity biases in respiratory protective equipment for healthcare workers in the Covid-19 pandemic

|                                 |                                                                                                                                                                                                                                                                                                                                                                                                                                                                                                                                                                                                                                                                       |
|---------------------------------|-----------------------------------------------------------------------------------------------------------------------------------------------------------------------------------------------------------------------------------------------------------------------------------------------------------------------------------------------------------------------------------------------------------------------------------------------------------------------------------------------------------------------------------------------------------------------------------------------------------------------------------------------------------------------|
| Journal:                        | <i>BMJ Open</i>                                                                                                                                                                                                                                                                                                                                                                                                                                                                                                                                                                                                                                                       |
| Manuscript ID                   | bmjopen-2020-047716.R2                                                                                                                                                                                                                                                                                                                                                                                                                                                                                                                                                                                                                                                |
| Article Type:                   | Original research                                                                                                                                                                                                                                                                                                                                                                                                                                                                                                                                                                                                                                                     |
| Date Submitted by the Author:   | 05-Apr-2021                                                                                                                                                                                                                                                                                                                                                                                                                                                                                                                                                                                                                                                           |
| Complete List of Authors:       | Carvalho, Clarissa; Guy's and St Thomas' NHS Foundation Trust Anaesthetic Service, Theatres Anaesthetics & Perioperative Medicine<br>Schumacher, Jan; Guy's and St Thomas' NHS Foundation Trust Anaesthetic Service, Theatres Anaesthetics & Perioperative Medicine<br>Greig, Paul; Guy's and St Thomas' NHS Foundation Trust Anaesthetic Service, Theatres Anaesthetics & Perioperative Medicine<br>Wong, Danny; Guy's and St Thomas' NHS Foundation Trust Anaesthetic Service, Theatres Anaesthetics & Perioperative Medicine<br>El Boghdady, Kariem; Guy's and St Thomas' NHS Foundation Trust Anaesthetic Service, Theatres Anaesthetics & Perioperative Medicine |
| <b>Primary Subject Heading</b>: | Global health                                                                                                                                                                                                                                                                                                                                                                                                                                                                                                                                                                                                                                                         |
| Secondary Subject Heading:      | Evidence based practice, Global health, Infectious diseases, Intensive care, Public health                                                                                                                                                                                                                                                                                                                                                                                                                                                                                                                                                                            |
| Keywords:                       | COVID-19, Health & safety < HEALTH SERVICES ADMINISTRATION & MANAGEMENT, OCCUPATIONAL & INDUSTRIAL MEDICINE, Adult intensive & critical care < ANAESTHETICS                                                                                                                                                                                                                                                                                                                                                                                                                                                                                                           |
|                                 |                                                                                                                                                                                                                                                                                                                                                                                                                                                                                                                                                                                                                                                                       |

SCHOLARONE™  
Manuscripts



I, the Submitting Author has the right to grant and does grant on behalf of all authors of the Work (as defined in the below author licence), an exclusive licence and/or a non-exclusive licence for contributions from authors who are: i) UK Crown employees; ii) where BMJ has agreed a CC-BY licence shall apply, and/or iii) in accordance with the terms applicable for US Federal Government officers or employees acting as part of their official duties; on a worldwide, perpetual, irrevocable, royalty-free basis to BMJ Publishing Group Ltd ("BMJ") its licensees and where the relevant Journal is co-owned by BMJ to the co-owners of the Journal, to publish the Work in this journal and any other BMJ products and to exploit all rights, as set out in our [licence](#).

The Submitting Author accepts and understands that any supply made under these terms is made by BMJ to the Submitting Author unless you are acting as an employee on behalf of your employer or a postgraduate student of an affiliated institution which is paying any applicable article publishing charge ("APC") for Open Access articles. Where the Submitting Author wishes to make the Work available on an Open Access basis (and intends to pay the relevant APC), the terms of reuse of such Open Access shall be governed by a Creative Commons licence – details of these licences and which [Creative Commons](#) licence will apply to this Work are set out in our licence referred to above.

Other than as permitted in any relevant BMJ Author's Self Archiving Policies, I confirm this Work has not been accepted for publication elsewhere, is not being considered for publication elsewhere and does not duplicate material already published. I confirm all authors consent to publication of this Work and authorise the granting of this licence.

1  
2  
3 **A prospective observational study of gender and ethnicity biases in**  
4 **respiratory protective equipment for healthcare workers in the Covid-19**  
5 **pandemic**  
6  
7  
8  
9  
10  
11  
12

13 Carvalho CYM,<sup>1</sup> Schumacher J,<sup>1,2</sup> Greig P,<sup>1,3</sup> Wong DJN,<sup>1</sup> El-Boghdadly K<sup>1,2</sup>  
14  
15

16  
17  
18 1 Consultant, Theatres, Anaesthesia and Perioperative Medicine, Guy's and St  
19 Thomas' NHS Foundation Trust, London, UK

20 2 King's College London, London, UK

21 3 Nuffield Department of Clinical Neurosciences, University of Oxford, Oxford, UK  
22  
23

24 **Correspondence to:**

25 Dr Clarissa Carvalho

26 Anaesthetic Department

27 Guy's & St Thomas' NHS Foundation Trust

28 Westminster Bridge Road

29 London SE1 7EH

30 [Clarissa.carvalho@gstt.nhs.uk](mailto:Clarissa.carvalho@gstt.nhs.uk)  
31  
32

33  
34  
35 No additional data is available but any queries will be answered by emailing

36 [Clarissa.carvalho@gstt.nhs.uk](mailto:Clarissa.carvalho@gstt.nhs.uk)  
37  
38  
39  
40

41 **Word Count** = 2453 words (excluding title page, abstract, references, figures and  
42 tables)  
43  
44  
45  
46  
47  
48  
49  
50

51 **Contributorship Statement**

52 Dr Clarissa Carvalho was the study lead, lead researcher and writer of this article.

53 Dr Jan Schumacher, Dr Paul Greig and Dr Kariem El-Boghdadly contributed to the

54 design of the study, the results interpretation and the writing and review of the

55 manuscript. Dr Danny Wong and Dr Paul Greig reviewed the results and conducted

56 the statistical analysis. Dr Danny Wong also contributed to the interpretation of the

57 results and the writing of the manuscript.  
58  
59  
60

**Copyright:**

The Corresponding Author, Dr Clarissa Carvalho, has the right to grant on behalf of all authors and does grant on behalf of all authors, an exclusive licence on a worldwide basis to the BMJ Publishing Group Ltd to permit this article (if accepted) to be published in BMJ editions and any other BMJ PGL products and sublicences such use and exploit all subsidiary rights.

**Short title:** Gender, ethnicity and fit testing

**Keywords:** COVID-19, PPE, RPE, fit testing, infection, ethnicity, gender

**Competing Interests:**

No Competing Interests. All authors have completed the Unified Competing Interest form and declare: no support from any organisation for the submitted; no financial relationships with any organisations that might have an interest in the submitted work in the previous three years; no other relationships or activities that could appear to have influenced the submitted work

**Transparency Declaration:**

The lead author, Dr Clarissa Carvalho, affirms that the manuscript is an honest, accurate and transparent account of the study reported. No important aspects of the study have been omitted and there were no discrepancies from the study as planned.

**Ethical Approval:** This study was assessed by the Research & Development Lead and the Clinical Governance Lead and was deemed exempt from ethical review as it met the criteria for a service evaluation. It was registered as a service evaluation with Guy's and St Thomas' NHS Foundation Trust (ID 10918).

**Funding:** No funding was required and no funding was provided.

**Sponsor:** The study sponsor was responsible for the management and progression of the study

**Statement of Independence of Researchers from funders:** Each researcher worked independently of funding. No funding was required for this study.

**Data Availability:** No additional data available

## Abstract

### Objective:

To describe success rates of respiratory protective equipment (RPE) fit testing and factors associated with achieving suitable fit.

### Design:

Prospective observational study of RPE fit testing according to health and safety, and occupational health requirements.

### Setting:

A large tertiary referral UK healthcare facility.

### Population:

1443 healthcare workers undergoing quantitative fit testing.

### Main outcome measures:

Quantitative fit test success (pass/fail), and the count of tests each participant required before successful fit.

### Results:

Healthcare workers were fit tested a median (interquartile range [IQR]) 2 (1–3) times before successful fit was obtained. Males were tested a median 1 (1–2) times, while females were tested a median 2 (1–2) times before a successful fit was found. This difference was statistically significant ( $p < 0.001$ ). Modelling each fit test as its own independent trial ( $n = 2359$ ) using multivariable logistic regression, male healthcare workers were significantly more likely to find a well-fitting respirator and achieve a successful fit on first attempt in comparison to females, after adjusting for other factors (adjusted odds ratio [OR] = 2.07, 95% confidence interval [CI]: 1.66–2.60,  $p < 0.001$ ). Staff who described their ethnicity as White were also more likely to achieve a successful fit compared to staff who described their ethnicity as Asian (OR = 0.47, 95% CI: 0.38–0.58,  $p < 0.001$ ), Black (OR = 0.54, 95% CI: 0.41–0.71,  $p < 0.001$ ), Mixed (OR = 0.50, 95% CI: 0.31–0.80,  $p = 0.004$ ), or Other (OR = 0.53, 95% CI: 0.29–0.99,  $p = 0.043$ ).

## Conclusions

Male and white ethnicity healthcare workers are more likely to achieve RPE fit test success. This has broad operational implications to healthcare services with a large female and Black, Asian and minority ethnic group population. Fit-testing is imperative in ensuring RPE effectiveness in protecting healthcare workers during the Covid-19 pandemic and beyond.

## Strengths & Weaknesses

- This was a single centre study.
- Although the demographics of the workforce observed in our study accurately reflects those of the NHS workforce in London (UK) they may not be reflective of the rest of the country.
- A large number of fit tests and participants were observed.
- Each individual did not test on every model of face mask.
- Other factors affecting the fit testing were not investigated or adjusted for.

1  
2  
3  
4 **A prospective observational study of gender and ethnicity biases in**  
5  
6 **respiratory protective equipment for healthcare workers in the Covid-19**  
7  
8 **pandemic**  
9  
10

11  
12 Carvalho CYM, Schumacher J, Greig P, Wong DJN, El-Boghdadly K  
13  
14

15  
16  
17  
18  
19 **Introduction**  
20  
21

22  
23 The Covid-19 pandemic has dramatically affected the delivery of healthcare. Many  
24 routine procedures that produce potentially infectious aerosols were previously  
25 conducted regularly without protective face coverings, but this is no longer appropriate  
26 during the pandemic. Preventing aerosolised spread of infection from patients to  
27 healthcare workers relies on effective use of respiratory protective equipment (RPE),  
28 including tight-fitting filtering facepiece (FFP) respirators.[1-3] Protection of healthcare  
29 workers with suitable RPE must be prioritised as their exposure places them at high  
30 risk of contracting infection with Covid-19.[4-5] Critical shortages in the availability of  
31 adequate RPE have been highlighted, with healthcare workers from Black, Asian and  
32 minority ethnic (BAME) groups being disproportionately affected.[6]  
33  
34  
35  
36  
37  
38  
39  
40  
41  
42  
43  
44  
45  
46  
47  
48

49 The effectiveness of a respirator depends on a good fit on the healthcare workers'  
50 face.[7-9] Although respirators are designed to fit the majority of individuals, no single  
51 respirator can provide a universal fit.[8-11] The fit of RPE has been suggested to be  
52 unsuitable for women and BAME healthcare workers, however there remains  
53 insufficient objective data demonstrating this disparity. There is therefore a need to  
54  
55  
56  
57  
58  
59  
60

1  
2  
3 assess the ethnodemographic impact on suitability of respirators provided by  
4 employers. The purpose of this observational study is therefore to determine if  
5 ethnicity and gender are factors in the suitability of respirators in healthcare workers  
6 exposed to patients with Covid-19.  
7  
8  
9  
10  
11  
12  
13  
14  
15  
16

## 17 **Methods**

18  
19  
20 We conducted a prospective observational study examining fit testing results by  
21 ethnicity and gender from staff in a central London teaching hospital and designated  
22 Covid-19 centre. This study was deemed exempt from ethical review as it met the  
23 criteria for a service evaluation and was registered with Guy's and St Thomas' NHS  
24 Foundation Trust (ID 10918) as a service evaluation. No patients or members of the  
25 public were included in this study. All members of the workforce in patient-facing roles  
26 were eligible to attend the fit testing clinic. We included healthcare workers who  
27 underwent quantitative fit tests (QNFT) only. Exclusion criteria were healthcare  
28 workers who were not in patient-facing roles, those unable to undertake the fit testing  
29 procedure (e.g. unable to remove head wear, remove facial hair, or unable to perform  
30 the procedure), those that underwent only qualitative fit testing, or those unwilling to  
31 participate in fit testing.  
32  
33  
34  
35  
36  
37  
38  
39  
40  
41  
42  
43  
44  
45  
46  
47  
48  
49

50 Fit testing data were collected between 3<sup>rd</sup> February and 3<sup>rd</sup> July 2020 and included  
51 the participant's self-described gender and ethnicity in free-text. The free-text  
52 responses were mapped to the Office of National Statistics categories for ethnicity as  
53 used in the UK census.[12]  
54  
55  
56  
57  
58  
59  
60



1  
2  
3 Fit testing was conducted by certified fit testers. Participants had to refrain from  
4 smoking one hour prior to the test, had to be clean shaven and could not wear any  
5 head wear. The QNFT involved the use of a TSI Portacount 8030 (TSI UK, High  
6  
7  
8 Wycombe) using the standard Health and Safety Executive fit testing procedure.[13]  
9

10  
11  
12  
13  
14 QNFT fit test scores were dichotomised as pass or fail based on achieving an overall  
15 fit factor >100. We report the overall numbers and proportions of staff who passed  
16 their first fit test and grouped by self-reported gender and ethnicity. The likelihood of  
17 passing the first fit test for male and female genders, and White and BAME groups  
18 were compared using Pearson's Chi-squared test (without Yate's Continuity, as all cell  
19 frequencies were greater than 10). Logistic regression modelling was performed using  
20 each fit test as a separate observation, with the binary outcome variable defined as fit  
21 test success (pass/fail), and using the following explanatory variables: gender,  
22 ethnicity and mask design (disposable vs reusable). We first modelled the bivariate  
23 association between the outcome variable and each explanatory variable separately,  
24 and then in a multivariable model including all explanatory variables to obtain adjusted  
25 odds ratio (OR) estimates. Mask designs were specified in our models as categorical  
26 variables and were compared against a reference design A, which was our most  
27 widely-tested disposable mask design. The following *post hoc* analyses were  
28 performed to assess the possibility that healthcare workers could learn to game the fit  
29 testing process and repeated testing of the same healthcare workers using different  
30 masks could render the tests not independent of each other: First we fitted mixed  
31 effects logistic regression models with random-intercepts for healthcare workers,  
32 assuming that tests were nested within healthcare workers; Second we repeated the  
33 original fixed-effects only logistic regression modelling with a subset of our dataset,  
34  
35  
36  
37  
38  
39  
40  
41  
42  
43  
44  
45  
46  
47  
48  
49  
50  
51  
52  
53  
54  
55  
56  
57  
58  
59  
60

only including data from first attempt fit tests. The results of the *post hoc* analyses were compared with our original findings and reported within the Supplementary Material Figure A and Figure B. All analyses were performed in Microsoft Excel (Microsoft Corporation, Redmond, WA, USA) and R version 3.5.2 (R Foundation for Statistical Computing, Vienna, Austria). Only records with complete data for the variables modelled (gender, ethnicity, mask design, outcome of fit test) were analysed. Continuous variables are reported as mean (standard deviation [SD]) for normally- or uniformly-distributed data, or median (interquartile range [IQR]) for data with skewed distributions. For discrete variables, numbers and proportions are reported. Non-parametric data were compared with the Mann-Whitney U test, and the students t test was used for parametric data. A p value of <0.05 was considered statistically significant.

**Patient and Public Involvement:** There was no patient or public involvement in this study.

## Results

A total of 1443 healthcare workers underwent fit testing during the study period. After exclusions were applied, a total of 1182 records were available for analysis. The gender and ethnicity breakdowns for the staff members are described in Table 1.

*Table 1: Gender and ethnicity of the staff that underwent quantitative fit testing*

|                  | <i>n (%)</i><br><i>(n = 1182)</i> |
|------------------|-----------------------------------|
| <b>Gender</b>    |                                   |
| Male             | 365 (30.9%)                       |
| Female           | 817 (69.1%)                       |
| <b>Ethnicity</b> |                                   |
| White            | 557 (47.1%)                       |
| Asian            | 383 (32.4%)                       |
| Black            | 175 (14.8%)                       |

|       |           |
|-------|-----------|
| Mixed | 39 (3.3%) |
| Other | 28 (2.4%) |

Each staff member was fit tested a median (IQR) 2 (1–3) times before a successful fit was found. Males were tested a 1 (1–2) times and females 2 (1–2) times before a successful fit was found ( $p < 0.001$ ).

There were 2359 independent quantitative fit tests modelled using logistic regression (Table 2). Values are number (proportion) or odds ratio (95%CI). To assess the possibility of non-independence between tests performed on the same healthcare worker, an additional *post hoc* mixed-effects model fitted with random-intercepts for healthcare workers did not materially change our findings (Supplementary Material, Figure A). Similarly, a *post hoc* fixed-effects only model fitted using only data from first fit test attempts also did not materially change our findings (Supplementary Material, Figure B).

Male healthcare workers were significantly more likely to pass a fit test compared with females. Staff who describe their ethnicity as White were also more likely to achieve a successful fit test compared to staff who describe their ethnicity as Asian, Black, mixed, or Other (Table 3). There was wide variation in the likelihood of achieving successful mask fit between the different mask designs. The different mask designs were all N99 or FFP3 filtration, were CE marked and approved according to the European Norm EN149:2001 (Supplementary table). Mask designs demonstrated variable performance in terms of obtaining a successful fit (Table 2). Investigating the conditional probability of successful fit a first attempt by gender and ethnicity, males were generally more likely to achieve success than females ( $p < 0.001$ , Table 3).

Table 2: Logistic regression models. (D) = disposable mask; (R) = reusable mask.

| Dependent outcome:<br>Successful fit |              | Fail<br>n (%) | Pass<br>n (%) | OR (univariable)          | OR<br>(multivariable)     |
|--------------------------------------|--------------|---------------|---------------|---------------------------|---------------------------|
| Gender                               | Female       | 709 (80.8%)   | 1007 (67.9%)  | -                         | -                         |
|                                      | Male         | 168 (19.2%)   | 475 (32.1%)   | 1.99 (1.63-2.44, p<0.001) | 2.07 (1.66-2.60, p<0.001) |
| Ethnicity                            | White        | 301 (34.3%)   | 721 (48.7%)   | -                         | -                         |
|                                      | Asian        | 357 (40.7%)   | 478 (32.3%)   | 0.56 (0.46-0.68, p<0.001) | 0.47 (0.38-0.58, p<0.001) |
|                                      | Black        | 154 (17.6%)   | 198 (13.4%)   | 0.54 (0.42-0.69, p<0.001) | 0.54 (0.41-0.71, p<0.001) |
|                                      | Mixed        | 42 (4.8%)     | 51 (3.4%)     | 0.51 (0.33-0.78, p=0.002) | 0.50 (0.31-0.80, p=0.004) |
|                                      | Other        | 23 (2.6%)     | 34 (2.3%)     | 0.62 (0.36-1.08, p=0.083) | 0.53 (0.29-0.99, p=0.043) |
| RPE mask model                       | Design A (D) | 63 (7.2%)     | 307 (20.7%)   | -                         | -                         |
|                                      | Design B (D) | 9 (1.0%)      | 5 (0.3%)      | 0.11 (0.03-0.34, p<0.001) | 0.11 (0.03-0.35, p<0.001) |
|                                      | Design C (D) | 159 (18.1%)   | 84 (5.7%)     | 0.11 (0.07-0.16, p<0.001) | 0.09 (0.06-0.14, p<0.001) |
|                                      | Design D (D) | 38 (4.3%)     | 33 (2.2%)     | 0.18 (0.10-0.30, p<0.001) | 0.16 (0.09-0.27, p<0.001) |
|                                      | Design E (D) | 87 (9.9%)     | 45 (3.0%)     | 0.11 (0.07-0.17, p<0.001) | 0.10 (0.06-0.16, p<0.001) |
|                                      | Design F (D) | 47 (5.4%)     | 43 (2.9%)     | 0.19 (0.11-0.31, p<0.001) | 0.18 (0.11-0.30, p<0.001) |
|                                      | Design G (R) | 3 (0.3%)      | 6 (0.4%)      | 0.41 (0.11-1.98, p=0.216) | 0.47 (0.12-2.33, p=0.305) |
|                                      | Design H (R) | 2 (0.2%)      | 7 (0.5%)      | 0.72 (0.17-4.90, p=0.684) | 0.64 (0.14-4.50, p=0.592) |
|                                      | Design I (R) | 14 (1.6%)     | 103 (7.0%)    | 1.51 (0.83-2.91, p=0.193) | 1.70 (0.93-3.31, p=0.096) |
|                                      | Design J (R) | 214 (24.4%)   | 233 (15.7%)   | 0.22 (0.16-0.31, p<0.001) | 0.24 (0.17-0.34, p<0.001) |
|                                      | Design K (R) | 86 (9.8%)     | 394 (26.6%)   | 0.94 (0.66-1.34, p=0.735) | 0.97 (0.67-1.39, p=0.863) |
|                                      | Design L (R) | 152 (17.3%)   | 218 (14.7%)   | 0.29 (0.21-0.41, p<0.001) | 0.29 (0.21-0.41, p<0.001) |
|                                      | Others       | 3 (0.3%)      | 4 (0.3%)      | 0.27 (0.06-1.42, p=0.095) | 0.29 (0.06-1.51, p=0.112) |

Table 3: Conditional probabilities of successful first attempt fit by gender and ethnicity. Values are number or proportion.

| Gender | Ethnicity | Failed first fit attempt (n) | Passed first fit attempt (n) | Probability of passing first fit attempt (%) |
|--------|-----------|------------------------------|------------------------------|----------------------------------------------|
| F      | White     | 206                          | 163                          | 44.2%                                        |
|        | Asian     | 164                          | 97                           | 37.2%                                        |
|        | Black     | 78                           | 65                           | 45.5%                                        |
|        | Mixed     | 23                           | 9                            | 28.1%                                        |
|        | Other     | 7                            | 5                            | 58.3%                                        |
| M      | White     | 80                           | 108                          | 57.4%                                        |
|        | Asian     | 66                           | 56                           | 45.9%                                        |
|        | Black     | 15                           | 17                           | 53.1%                                        |
|        | Mixed     | 3                            | 4                            | 57.1%                                        |
|        | Other     | 9                            | 7                            | 43.8%                                        |

## Discussion

We investigated the suitability of respirators worn by healthcare workers and report new evidence that indicates lower RPE fit testing success rates among BAME and female healthcare workers.[3,4] This may indicate that certain groups may be at particular risk from Covid-19 infection in the workplace due to unsuitable respiratory protection.

The demographic diversity in our data may differ to the NHS England workforce. However, it is not dissimilar to the demographics expected of a healthcare facility in central London and so it is representative of London healthcare workers. BAME healthcare workers may account for 19.8% of the NHS workforce in England but ethnic minority healthcare workers demonstrate a higher representation in London (44.9%) with 1.7% identifying as having a mixed ethnic background.[14] Failure of RPE to protect BAME healthcare workers affects a significant proportion of the NHS workforce.

Our data suggest that there could be biases in design and certification of respirators. Respirator design has historically focused on the fit for individuals from the US Air Force in the 1967-68.[10,15] However, it is unclear if the anthropometric data collected was even representative of the workforce in the 1960s and 70s as the US Air Force had clear height and weight restrictions, and consisted mainly of men.[15] Population demographics have changed drastically in the UK and US since the 1960s, with increased numbers of women and people from ethnic minorities in all workplaces. This historical data is therefore unlikely to reflect current workforce demographics. [6,15,14]

1  
2  
3  
4 Recognising that the standard fit panels may no longer be appropriate, the National  
5 Institute for Occupational Safety and Health (NIOSH) conducted a new survey of the  
6 US work force in 2001.[16] 4026 subjects from 41 different sites in, eight states were  
7 recruited, and new fit moulding panels were proposed based on the anthropometric  
8 data collected.[16] However, the ethnic groups described in this study differ from the  
9 UK. The demographics of the workforce describes one third of the population as  
10 Hispanic and specifically categorises the ethnicities as White, African American,  
11 Hispanic and Other.[15,16] However, the largest ethnic group after White British in  
12 England and Wales is “White other”, followed by Asian – Indian, Asian – Pakistani,  
13 Black – African and Asian other.[12] Although NIOSH suggest their data can be used  
14 as a starting point for design and certification as the US population is ethnically  
15 diverse, the US data may not map accurately to the ethnic makeup of the UK  
16 healthcare workforce. Every individual has different features which vary by gender,  
17 ethnicity and even occupational role.[17] Face length is a key feature in respirator fit  
18 and this has been shown to vary significantly across ethnic and gender groups.[17]  
19 For example, anthropometric data shows statistically significant differences in width  
20 and face and lip length between African Americans and White Americans.[17] A  
21 sample of African Americans and Hispanic individuals in the US workforce were found  
22 to have up to face lengths 2.7 and 2.8 mm longer than White Americans.[17] Prior to  
23 Covid-19 most respirators were used in industrial applications such as construction.  
24 Construction workers are more likely to be male than healthcare staff, and have  
25 different facial features, including longer noses.[17] Gender has also been shown to  
26 be a major determinant in facial differences and measurements. Nine out of 10 facial  
27 measurements vary by gender with the female face being significantly smaller than  
28  
29  
30  
31  
32  
33  
34  
35  
36  
37  
38  
39  
40  
41  
42  
43  
44  
45  
46  
47  
48  
49  
50  
51  
52  
53  
54  
55  
56  
57  
58  
59  
60

1  
2  
3 the male face.[17] This is of relevance to respirator fit in healthcare workers as 77%  
4  
5 of the NHS workforce is female.  
6  
7  
8  
9

10 Future respirator design should consider the facial characteristics of the demographic  
11  
12 of the workforce. Face panels consisting of a true representation of female and BAME  
13  
14 healthcare workers could help improve respirator design and improve safety when  
15  
16 caring for Covid-19 patients. Out-dated fit panels used in the design and certification  
17  
18 of the respirators demonstrate the institutional gender and racial biases in respirator  
19  
20 fit and must be addressed in order to protect BAME and female staff.  
21  
22  
23  
24  
25

26 Use of facial anthropometric data representing the current demographics of the  
27  
28 workforce is not only important in the design of RPE, it can be used to guide  
29  
30 procurement strategies for the ongoing pandemic. For example, females have on  
31  
32 average smaller faces so looking at the different proportions of female versus male  
33  
34 healthcare workers can guide what proportion of the procured respirators should be  
35  
36 smaller versus large.  
37  
38  
39  
40  
41

42 Examining the shape and measurements of the respirator in comparison to a face  
43  
44 panel representing the workforce could help decision making in procurement. These  
45  
46 techniques using facial anthropometric data representative of the workforce and  
47  
48 observing the success or fail rate of different respirator designs in each ethnic or  
49  
50 gender group could help with the decision-making process of which respirators to  
51  
52 stock. Guiding procurement processes can prevent excesses of poorly sized  
53  
54 respirators and shortages of the correct sizes.  
55  
56  
57  
58  
59  
60

1  
2  
3 However, even if the correct respirator for the demographic of the workforce was  
4 sourced, supply and demand issues of RPE early in the Covid-19 pandemic meant  
5 healthcare facilities could not rely upon a steady supply of any single preferred  
6 respirator. Every respirator has a different design and fit, therefore individuals should  
7 be fit tested on the respirator model they don prior to patient interactions.[8,13] The  
8 multiple changes in respirator models mean healthcare workers must be repeatedly fit  
9 tested on the new models as supplies change. As healthcare facilities were  
10 overwhelmed with the need to fit test staff repeatedly on different masks many adopted  
11 an approach to fit check only.[9] Our data demonstrates that respirators have a  
12 variable success rate on initial fit test. For example, Design J did not suitably fit 24.4%  
13 of our staff. Some studies have demonstrated a fail rate as high as 78% when a  
14 respirator is used without fit testing.[10] Failure to fit test may leave a significant  
15 proportion of staff inadequately protected against Covid-19 and according to our data  
16 it is mixed ethnicity and Asian female healthcare workers who are at greatest risk.

### 36 **Limitations**

37  
38  
39 This was a single centre study. The demographics of our data is representative of  
40 healthcare facilities in the London however further data should be collected to  
41 extrapolate the results to other areas. A large number of respirators were observed  
42 in this study and each individual did not test on every model. More data are required  
43 to evaluate the efficacy of each model. Finally, previous experience with fit-testing  
44 was not accounted for, although quantitative fit-testing is objective and independent  
45 of experience, and the use of respirators was generally poor prior to the pandemic so  
46 we assumed a homogeneous lack of experience in our cohort.  
47  
48  
49  
50  
51  
52  
53  
54  
55  
56  
57  
58  
59  
60



## Conclusion

Respirator design and certification may be biased towards fitting a demographic that is not reflective of the current healthcare workforce. This could leave many healthcare workers vulnerable as they struggle to fit into a mask not designed for their faces. Lack of design consideration and supply issues could be a dangerous combination for healthcare staff as they rely upon the protection of a properly fitted respirator to reduce the risk of infection transmission whilst caring for patients with Covid-19.

Further research into the design and fit of respiratory protective equipment must consider the demographic of the healthcare workforce as we cannot rely on anthropometric data that represents only one section of the workforce. Creating new fit panels that accurately represent female workers and the ethnically diverse healthcare workforce is an essential first step towards designing well-fitting respirators. In the meantime, it is important to recognise that no one mask will fit all staff. [8-11,13] Therefore the focus should be on employers stocking a suite of RPE, so that a diverse workforce has the best chance of finding a respirator of appropriate fit.

Ensuring fit-testing and keeping adequate stock of a variety of respirator models can help maintain the safety of the whole workforce but future research should focus on the design of respirators for BAME and female healthcare workers.

## Acknowledgements

We would like to thank Sister Gillian Crooks for her incredible work in fit testing and Steve Copping, Head of Health & Safety, for his advice and expertise in Fit Testing and PPE.

## References

1. Livingston E, Desai A, Berkwits M. Sourcing Personal Protective Equipment During the COVID-19 pandemic. *JAMA* 2020; 323:1912-1914
2. Public Health England. Guidance - Covid-19 Personal Protective Equipment 2020 <https://www.gov.uk/government/publications/wuhan-novel-coronavirus-infection-prevention-and-control/covid-19-personal-protective-equipment-ppe>
3. The Lancet. Editorial - COVID-19: Protecting health-care workers. March 2020.  
<http://www.sciencedirect.com/science/article/pii/S0140673620306449>
4. El-Boghdadly K, Wong DJN, Owen R, et al. Risks to healthcare workers following tracheal intubation of patients with COVID-19: a prospective international multicentre cohort study. *Anaesthesia* June 2020; 75: 1437-1447
5. Cook T, Kursumovic E, Lennane S. Exclusive: Deaths of NHS Staff from COVID-19 analysed. April 2020 <https://www.hsj.co.uk/exclusive-deaths-of-nhs-staff-from-covid-19-analysed/7027471.article>

- 1  
2  
3 6. Amnesty International. UK among the highest COVID-19 healthcare  
4 worker deaths in the world 2020. [https://www.amnesty.org.uk/press-](https://www.amnesty.org.uk/press-releases/uk-among-highest-covid-19-health-worker-deaths-world)  
5  
6 releases/uk-among-highest-covid-19-health-worker-deaths-world  
7  
8  
9
- 10  
11  
12 7. British Medical Association. BMA survey reveals almost half of doctors  
13 have relied upon donated or self-bought PPE and two thirds still don't feel  
14 fully protected 2020. [https://www.bma.org.uk/bma-media-centre/bma-](https://www.bma.org.uk/bma-media-centre/bma-survey-reveals-almost-half-of-doctors-have-relied-upon-donated-or-self-bought-ppe-and-two-thirds-still-don-t-feel-fully-protected)  
15 survey-reveals-almost-half-of-doctors-have-relied-upon-donated-or-self-  
16 bought-ppe-and-two-thirds-still-don-t-feel-fully-protected  
17  
18  
19  
20  
21  
22  
23
- 24  
25  
26 8. Health and Safety Executive. Fit Testing Face Masks to Avoid  
27 Transmission during the coronavirus outbreak. 2020.  
28  
29  
30  
31 [https://www.hse.gov.uk/coronavirus/ppe-face-masks/face-mask-ppe-](https://www.hse.gov.uk/coronavirus/ppe-face-masks/face-mask-ppe-rpe.htm)  
32 rpe.htm  
33  
34  
35  
36
- 37  
38 9. The Guardian. Hospitals Accused of Risking Staff Lives by Abandoning  
39 PPE Fit Tests. March 2020.  
40  
41  
42 [https://www.theguardian.com/world/2020/apr/14/nhs-hospitals-accused-](https://www.theguardian.com/world/2020/apr/14/nhs-hospitals-accused-of-risking-staff-lives-by-abandoning-ppe-fit-tests-coronavirus)  
43 of-risking-staff-lives-by-abandoning-ppe-fit-tests-coronavirus  
44  
45  
46  
47  
48  
49  
50
- 51  
52 10. Manganyi J, Wilson K, Rees D. Quantitative respirator fit, face sizes and  
53 determinants of fit in South African diagnostic laboratory respirator users.  
54  
55  
56 *Annals of Work Exposures and Health* Nov 2017; 61;9:1154-1162  
57  
58  
59  
60

- 1  
2  
3 11. Oestenstad R, Elliot L, Beasley T. The effect of gender and respirator  
4 brand on the association of respirator fit with facial dimensions. Journal of  
5 Occupational and Environmental Hygiene Dec 2007;4 923-930  
6  
7  
8  
9  
10  
11  
12 12. UK Census 2011. Ethnicity Facts and Figures [https://www.ethnicity-facts-](https://www.ethnicity-facts-figures.service.gov.uk/)  
13 [figures.service.gov.uk/](https://www.ethnicity-facts-figures.service.gov.uk/)  
14  
15  
16  
17  
18  
19 13. Health and Safety Executive. Guidance on respiratory protective  
20 equipment (RPE) fit testing 2019. [https://www.hse.gov.uk/respiratory-](https://www.hse.gov.uk/respiratory-protective-equipment/)  
21 [protective-equipment/](https://www.hse.gov.uk/respiratory-protective-equipment/)  
22  
23  
24  
25  
26  
27  
28 14. NHS England. NHS Workforce Race and Equality Standard Report 2019.  
29 [https://www.england.nhs.uk/wp-content/uploads/2020/01/wre-2019-data-](https://www.england.nhs.uk/wp-content/uploads/2020/01/wre-2019-data-report.pdf)  
30 [report.pdf](https://www.england.nhs.uk/wp-content/uploads/2020/01/wre-2019-data-report.pdf)  
31  
32  
33  
34  
35  
36  
37 15. Bailar J, Meyer E, Pool R. Institute of Medicine: Assessment of the  
38 NIOSH head-and-face anthropometric survey of US respirator users.  
39 2007 pp1-108  
40  
41  
42  
43  
44  
45  
46  
47 16. American Industrial Hygiene Association. Respirator Fit Testing Methods  
48 2010 ISBN 978-1-935082-24-8  
49  
50  
51  
52  
53  
54  
55 17. Zhuang Z, Landsittel D, Benson S et al. Facial Anthropometric  
56 differences among gender, ethnicity and age groups. Annals of  
57 Occupational Hygiene Jun 2010; 54(4):391-402  
58  
59  
60

Figure A

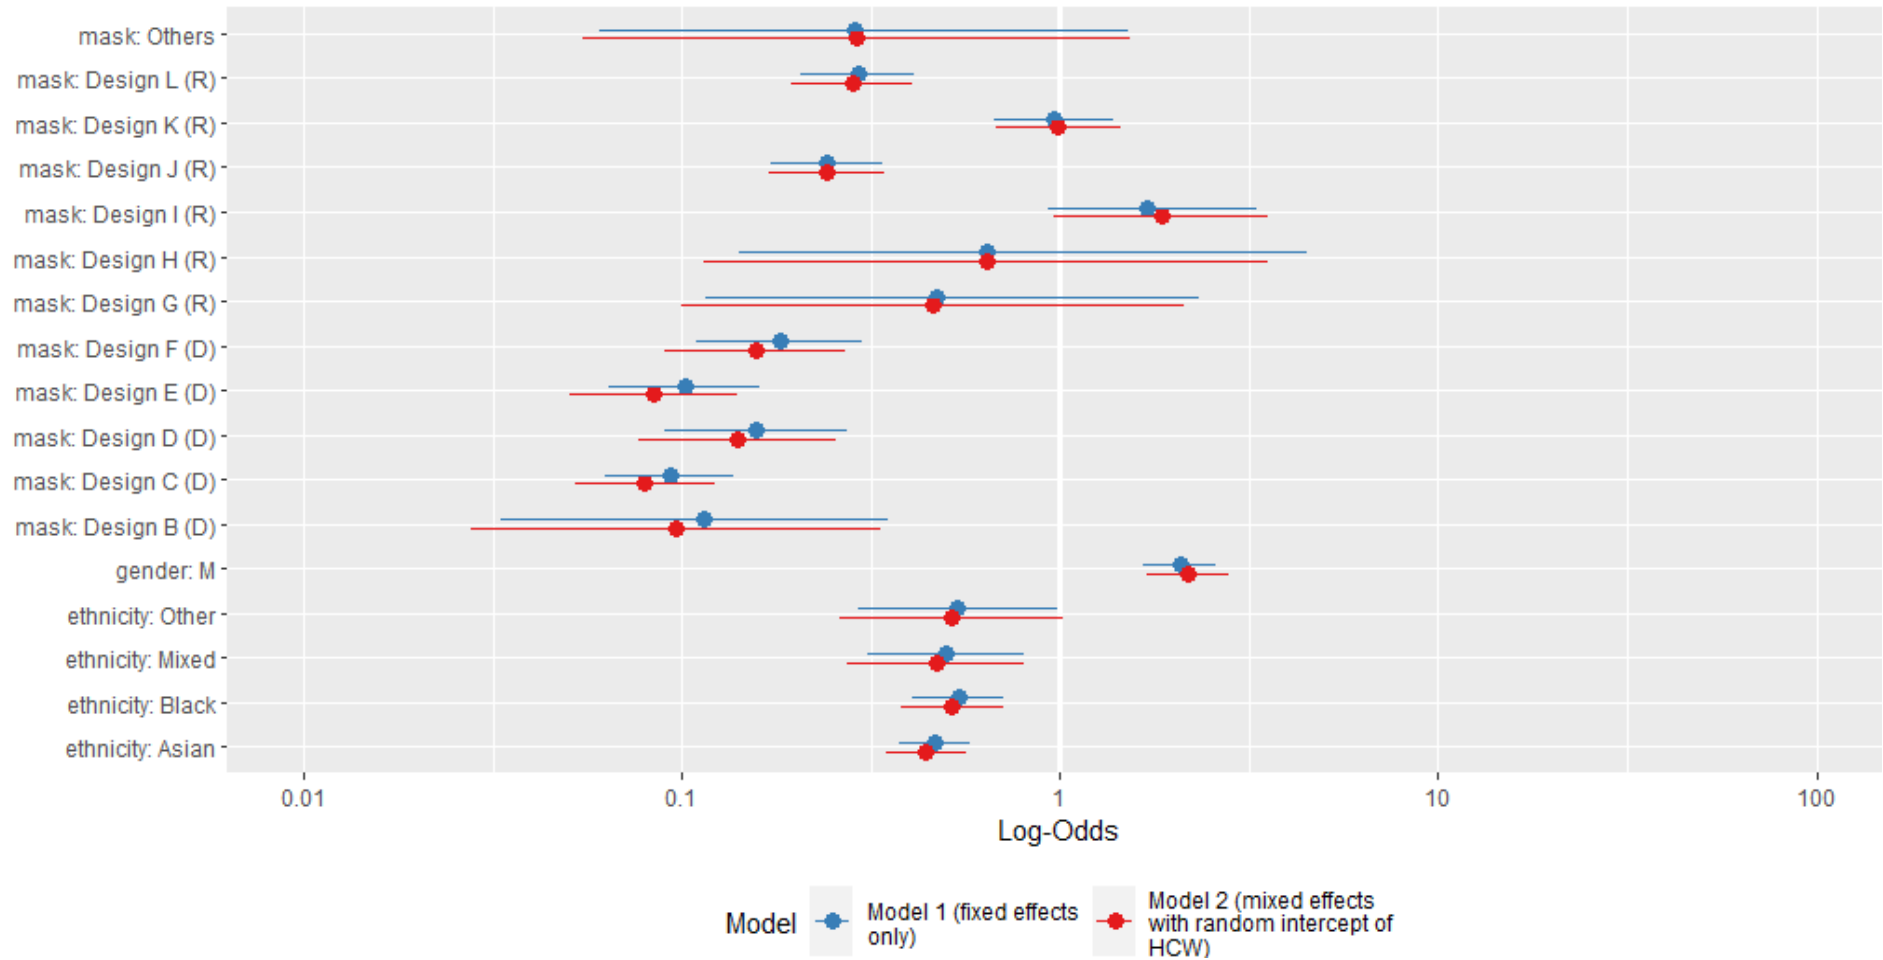

Figure A: Forest plot comparing the fixed effects point estimates and 95% confidence intervals the original model in the manuscript (Model 1) compared to a revised model fitted using mixed effects logistic regression with a random intercept for HCW (Model 2).

1  
2  
3  
4  
5  
6  
7  
8  
9  
10  
11  
12  
13  
14  
15  
16  
17  
18  
19  
20  
21  
22  
23  
24  
25  
26  
27  
28  
29  
30  
31  
32  
33  
34  
35  
36  
37  
38  
39  
40  
41  
42  
43  
44  
45  
46

Figure B

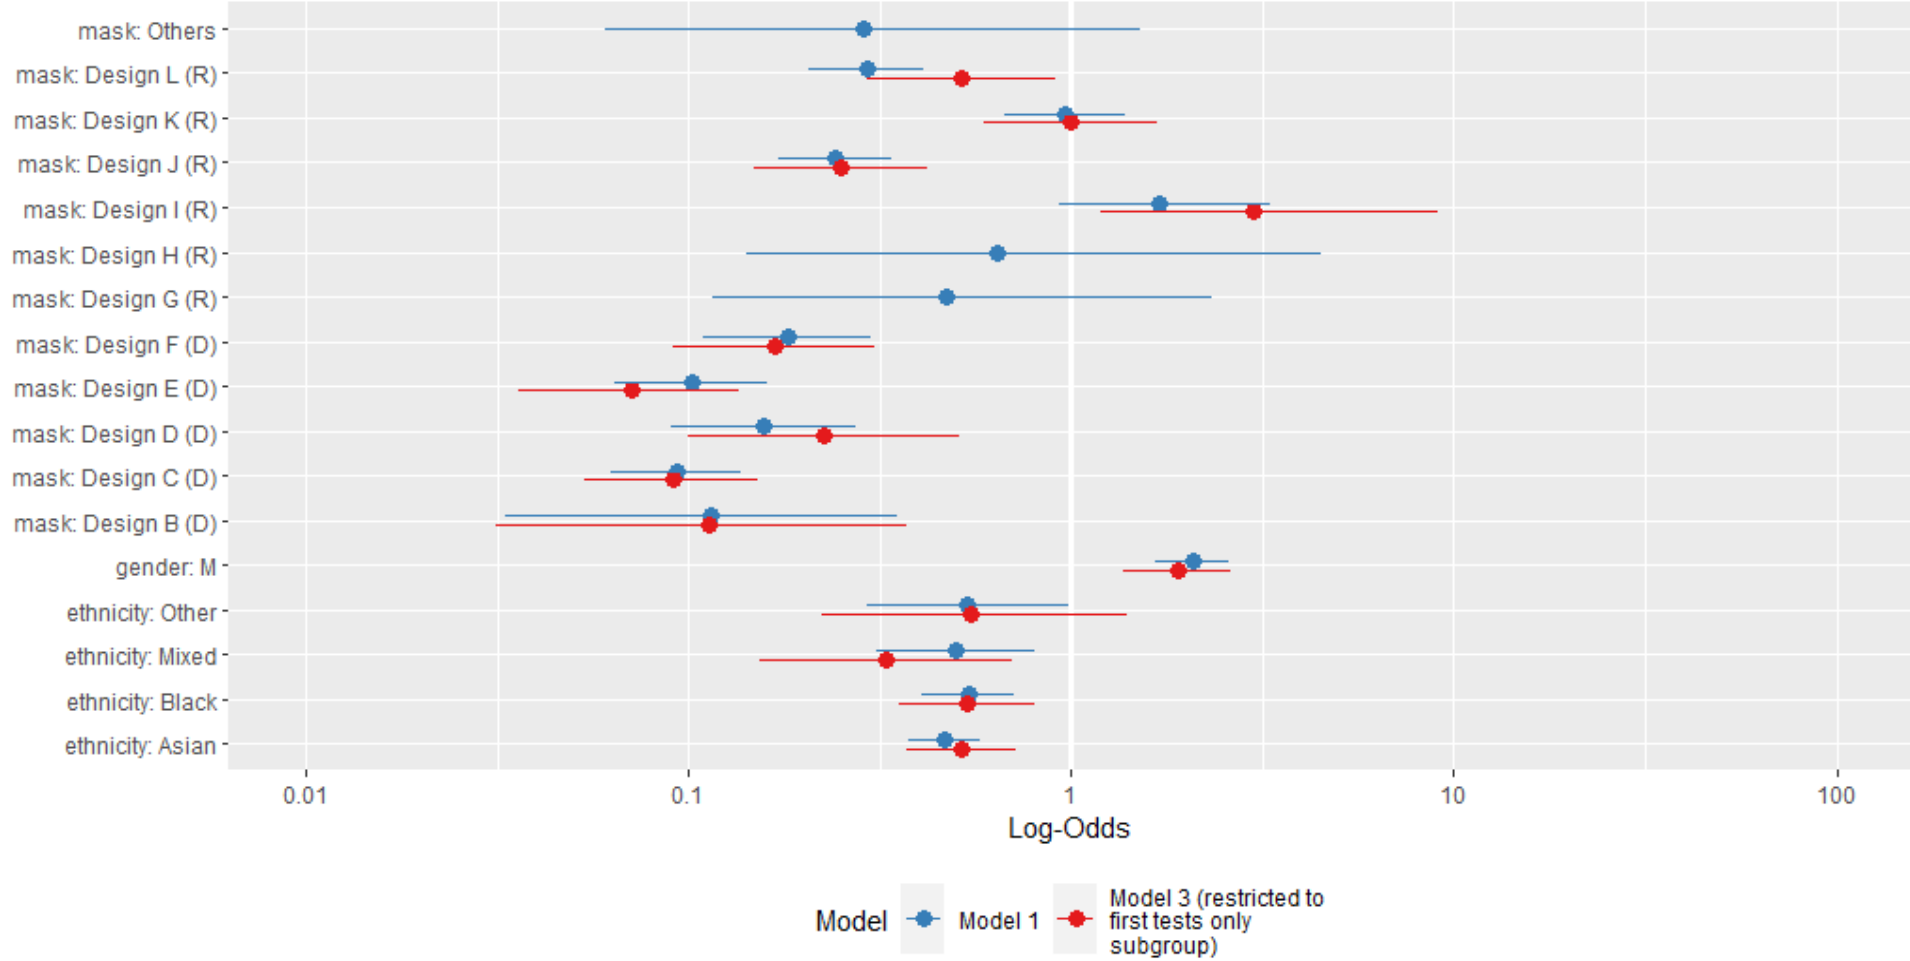

Figure A: Forest plot comparing the fixed effects point estimates and 95% confidence intervals the original model in the manuscript (Model 1) compared to a revised model fitted using only subgroup data from first fit test attempts (Model 3).

## Supplementary Table

*Supplementary Table: Description of Different Masks Used*

| <b>Mask Design</b> | <b>Manufacturer</b> | <b>Model</b>        | <b>Shape</b>     | <b>Expiratory Filter Y/N</b> | <b>Reusable (R) / Disposable (D)</b> | <b>Grade of mask</b>  |
|--------------------|---------------------|---------------------|------------------|------------------------------|--------------------------------------|-----------------------|
| A                  | Full Support Group  | Easimask FSM18      | Cup              | N                            | D                                    | FFP3 / N99 equivalent |
| B                  | Full Support Group  | Easimask FSM16      | Duckbill         | N                            | D                                    | FFP3 / N99 equivalent |
| C                  | 3M                  | 1863                | Fold out 3 Panel | N                            | D                                    | FFP3 / N99 equivalent |
| D                  | 3M                  | 8833                | Cup              | Y                            | D                                    | FFP3 / N99 equivalent |
| E                  | 3M                  | 1873                | Fold out 3 Panel | Y                            | D                                    | FFP3 / N99 equivalent |
| F                  | 3M                  | Aura 1863+          | Fold out 3 Panel | N                            | D                                    | FFP3 / N99 equivalent |
| G                  | 3M                  | 6500 +P3 Filter     | Half mask        | Y                            | R                                    | FFP3 / N99 equivalent |
| H                  | 3M                  | 7500 +P3 Filter     | Half mask        | Y                            | R                                    | FFP3 / N99 equivalent |
| I                  | Scott Safety        | Aviva 50 +P3 Filter | Half mask        | Y                            | R                                    | FFP3 / N99 equivalent |
| J                  | JSP Safety          | Force 8 +P3 Filter  | Half mask        | Y                            | R                                    | FFP3 / N99 equivalent |
| K                  | Sundstrom           | SR100 +P3 Filter    | Half mask        | Y                            | R                                    | FFP3 / N99 equivalent |
| L                  | PureFlo             | PF1000 +P3 Filter   | Half mask        | Y                            | R                                    | FFP3 / N99 equivalent |

**Revised Standards for Quality Improvement Reporting Excellence (SQUIRE 2.0)  
September 15, 2015**

| Text Section and Item Name                    | Section or Item Description                                                                                                                                                                                                                                                                                                                                                                                                                                                                                                                                                                                                                                                                                                                                                                                                                                                                                                                                                                                                             |
|-----------------------------------------------|-----------------------------------------------------------------------------------------------------------------------------------------------------------------------------------------------------------------------------------------------------------------------------------------------------------------------------------------------------------------------------------------------------------------------------------------------------------------------------------------------------------------------------------------------------------------------------------------------------------------------------------------------------------------------------------------------------------------------------------------------------------------------------------------------------------------------------------------------------------------------------------------------------------------------------------------------------------------------------------------------------------------------------------------|
| <b>Notes to authors</b>                       | <ul style="list-style-type: none"> <li>• The SQUIRE guidelines provide a framework for reporting new knowledge about how to improve healthcare</li> <li>• The SQUIRE guidelines are intended for reports that describe <a href="#">system</a> level work to improve the quality, safety, and value of healthcare, and used methods to establish that observed outcomes were due to the <a href="#">intervention(s)</a>.</li> <li>• A range of approaches exists for improving healthcare. SQUIRE may be adapted for reporting any of these.</li> <li>• Authors should consider every SQUIRE item, but it may be inappropriate or unnecessary to include every SQUIRE element in a particular manuscript.</li> <li>• The SQUIRE Glossary contains definitions of many of the key words in SQUIRE.</li> <li>• The Explanation and Elaboration document provides specific examples of well-written SQUIRE items, and an in-depth explanation of each item.</li> <li>• Please cite SQUIRE when it is used to write a manuscript.</li> </ul> |
| <b>Title and Abstract</b>                     |                                                                                                                                                                                                                                                                                                                                                                                                                                                                                                                                                                                                                                                                                                                                                                                                                                                                                                                                                                                                                                         |
| <b>1. Title</b>                               | Indicate that the manuscript concerns an <a href="#">initiative</a> to improve healthcare (broadly defined to include the quality, safety, effectiveness, patient-centeredness, timeliness, cost, efficiency, and equity of healthcare)                                                                                                                                                                                                                                                                                                                                                                                                                                                                                                                                                                                                                                                                                                                                                                                                 |
| <b>2. Abstract</b>                            | <ol style="list-style-type: none"> <li>a. Provide adequate information to aid in searching and indexing</li> <li>b. Summarize all key information from various sections of the text using the abstract format of the intended publication or a structured summary such as: background, local <a href="#">problem</a>, methods, interventions, results, conclusions</li> </ol>                                                                                                                                                                                                                                                                                                                                                                                                                                                                                                                                                                                                                                                           |
| <b>Introduction</b>                           | <i>Why did you start?</i>                                                                                                                                                                                                                                                                                                                                                                                                                                                                                                                                                                                                                                                                                                                                                                                                                                                                                                                                                                                                               |
| <b>3. <a href="#">Problem Description</a></b> | Nature and significance of the local <a href="#">problem</a>                                                                                                                                                                                                                                                                                                                                                                                                                                                                                                                                                                                                                                                                                                                                                                                                                                                                                                                                                                            |
| <b>4. Available knowledge</b>                 | Summary of what is currently known about the <a href="#">problem</a> , including relevant previous studies                                                                                                                                                                                                                                                                                                                                                                                                                                                                                                                                                                                                                                                                                                                                                                                                                                                                                                                              |

Page 1

Page 3

Page 6

Page 13-14



|                                        |                                                                                                                                                                                                                                                                                                                                                                                                                                                                                                                                                                                                                                              |                          |
|----------------------------------------|----------------------------------------------------------------------------------------------------------------------------------------------------------------------------------------------------------------------------------------------------------------------------------------------------------------------------------------------------------------------------------------------------------------------------------------------------------------------------------------------------------------------------------------------------------------------------------------------------------------------------------------------|--------------------------|
| 5. <a href="#">Rationale</a>           | Informal or formal frameworks, models, concepts, and/or <a href="#">theories</a> used to explain the <a href="#">problem</a> , any reasons or <a href="#">assumptions</a> that were used to develop the <a href="#">intervention(s)</a> , and reasons why the <a href="#">intervention(s)</a> was expected to work                                                                                                                                                                                                                                                                                                                           | Page 13-14<br>Page 15-16 |
| 6. <b>Specific aims</b>                | Purpose of the project and of this report                                                                                                                                                                                                                                                                                                                                                                                                                                                                                                                                                                                                    | Page 6,7, 13             |
| <b>Methods</b>                         | <i>What did you do?</i>                                                                                                                                                                                                                                                                                                                                                                                                                                                                                                                                                                                                                      |                          |
| 7. <a href="#">Context</a>             | Contextual elements considered important at the outset of introducing the <a href="#">intervention(s)</a>                                                                                                                                                                                                                                                                                                                                                                                                                                                                                                                                    | Page 7-8                 |
| 8. <a href="#">Intervention(s)</a>     | a. Description of the <a href="#">intervention(s)</a> in sufficient detail that others could reproduce it<br>b. Specifics of the team involved in the work                                                                                                                                                                                                                                                                                                                                                                                                                                                                                   | Page 7-8                 |
| 9. <b>Study of the Intervention(s)</b> | a. Approach chosen for assessing the impact of the <a href="#">intervention(s)</a><br>b. Approach used to establish whether the observed outcomes were due to the <a href="#">intervention(s)</a>                                                                                                                                                                                                                                                                                                                                                                                                                                            |                          |
| 10. <b>Measures</b>                    | a. Measures chosen for studying <a href="#">processes</a> and outcomes of the <a href="#">intervention(s)</a> , including rationale for choosing them, their operational definitions, and their validity and reliability<br>b. Description of the approach to the ongoing assessment of contextual elements that contributed to the success, failure, efficiency, and cost<br>c. Methods employed for assessing completeness and accuracy of data                                                                                                                                                                                            | Page 9                   |
| 11. <b>Analysis</b>                    | a. Qualitative and quantitative methods used to draw <a href="#">inferences</a> from the data<br>b. Methods for understanding variation within the data, including the effects of time as a variable                                                                                                                                                                                                                                                                                                                                                                                                                                         | Page 9-12                |
| 12. <b>Ethical Considerations</b>      | <a href="#">Ethical aspects</a> of implementing and studying the <a href="#">intervention(s)</a> and how they were addressed, including, but not limited to, formal ethics review and potential conflict(s) of interest                                                                                                                                                                                                                                                                                                                                                                                                                      | Page 13-16               |
| <b>Results</b>                         | <i>What did you find?</i>                                                                                                                                                                                                                                                                                                                                                                                                                                                                                                                                                                                                                    |                          |
| 13. <b>Results</b>                     | a. Initial steps of the <a href="#">intervention(s)</a> and their evolution over time (e.g., time-line diagram, flow chart, or table), including modifications made to the intervention during the project<br>b. Details of the <a href="#">process</a> measures and outcome<br>c. Contextual elements that interacted with the <a href="#">intervention(s)</a><br>d. Observed associations between outcomes, interventions, and relevant contextual elements<br>e. Unintended consequences such as unexpected benefits, problems, failures, or costs associated with the <a href="#">intervention(s)</a> .<br>f. Details about missing data | Page 9-12                |
| <b>Discussion</b>                      | <i>What does it mean?</i>                                                                                                                                                                                                                                                                                                                                                                                                                                                                                                                                                                                                                    |                          |
| 14. <b>Summary</b>                     | a. Key findings, including relevance to the <a href="#">rationale</a> and specific aims<br>b. Particular strengths of the project                                                                                                                                                                                                                                                                                                                                                                                                                                                                                                            | Page 11<br>Page 13-16    |

|                                                                                                                                                                                                                                                                                          |                                                                                                                                                                                                                                                                                                                                                                                                                                                                        |                                 |
|------------------------------------------------------------------------------------------------------------------------------------------------------------------------------------------------------------------------------------------------------------------------------------------|------------------------------------------------------------------------------------------------------------------------------------------------------------------------------------------------------------------------------------------------------------------------------------------------------------------------------------------------------------------------------------------------------------------------------------------------------------------------|---------------------------------|
| <p>1<br/>2<br/>3<br/>4<br/>5<br/>6<br/>7<br/>8<br/>9<br/>10<br/>11</p> <p><b>15. Interpretation</b></p>                                                                                                                                                                                  | <p>a. Nature of the association between the <a href="#">intervention(s)</a> and the outcomes</p> <p>b. Comparison of results with findings from other publications</p> <p>c. Impact of the project on people and <a href="#">systems</a></p> <p>d. Reasons for any differences between observed and anticipated outcomes, including the influence of <a href="#">context</a></p> <p>e. Costs and strategic trade-offs, including <a href="#">opportunity costs</a></p> | <p>page 9-11<br/>Page 13-14</p> |
| <p>12<br/>13<br/>14<br/>15<br/>16</p> <p><b>16. Limitations</b></p>                                                                                                                                                                                                                      | <p>a. Limits to the <a href="#">generalizability</a> of the work</p> <p>b. Factors that might have limited <a href="#">internal validity</a> such as confounding, bias, or imprecision in the design, methods, measurement, or analysis</p> <p>c. Efforts made to minimize and adjust for limitations</p>                                                                                                                                                              | <p>Page 16</p>                  |
| <p>17<br/>18<br/>19<br/>20<br/>21<br/>22</p> <p><b>17. Conclusions</b></p>                                                                                                                                                                                                               | <p>a. Usefulness of the work</p> <p>b. Sustainability</p> <p>c. Potential for spread to other <a href="#">contexts</a></p> <p>d. Implications for practice and for further study in the field</p> <p>e. Suggested next steps</p>                                                                                                                                                                                                                                       | <p>Page 15-17</p>               |
| <p>23<br/>24</p> <p><b>Other information</b></p>                                                                                                                                                                                                                                         |                                                                                                                                                                                                                                                                                                                                                                                                                                                                        |                                 |
| <p>25<br/>26<br/>27<br/>28<br/>29<br/>30<br/>31<br/>32<br/>33<br/>34<br/>35<br/>36<br/>37<br/>38<br/>39<br/>40<br/>41<br/>42<br/>43<br/>44<br/>45<br/>46<br/>47<br/>48<br/>49<br/>50<br/>51<br/>52<br/>53<br/>54<br/>55<br/>56<br/>57<br/>58<br/>59<br/>60</p> <p><b>18. Funding</b></p> | <p>Sources of funding that supported this work. Role, if any, of the funding organization in the design, implementation, interpretation, and reporting</p>                                                                                                                                                                                                                                                                                                             | <p>Page 2</p>                   |

1  
2  
3 **Table 2. Glossary of key terms used in SQUIRE 2.0. This Glossary provides the intended**  
4 **meaning of selected words and phrases as they are used in the SQUIRE 2.0 Guidelines. They**  
5 **may, and often do, have different meanings in other disciplines, situations, and settings.**  
6

### 7 **Assumptions**

8 Reasons for choosing the activities and tools used to bring about changes in healthcare services at  
9 the [system](#) level.  
10  
11

### 12 **Context**

13 Physical and sociocultural makeup of the local environment (for example, external environmental  
14 factors, organizational dynamics, collaboration, resources, leadership, and the like), and the  
15 interpretation of these factors (“sense-making”) by the healthcare delivery professionals, patients,  
16 and caregivers that can affect the effectiveness and [generalizability](#) of [intervention\(s\)](#).  
17  
18

### 19 **Ethical aspects**

20 The value of [system](#)-level [initiatives](#) relative to their potential for harm, burden, and cost to the  
21 stakeholders. Potential harms particularly associated with efforts to improve the quality, safety, and  
22 value of healthcare services include [opportunity costs](#), invasion of privacy, and staff distress  
23 resulting from disclosure of poor performance.  
24  
25

### 26 **Generalizability**

27 The likelihood that the [intervention\(s\)](#) in a particular report would produce similar results in other  
28 settings, situations, or environments (also referred to as external validity).  
29  
30

### 31 **Healthcare improvement**

32 Any systematic effort intended to raise the quality, safety, and value of healthcare services, usually  
33 done at the [system](#) level. We encourage the use of this phrase rather than “quality improvement,”  
34 which often refers to more narrowly defined approaches.  
35  
36

### 37 **Inferences**

38 The meaning of findings or data, as interpreted by the stakeholders in healthcare services –  
39 improvers, healthcare delivery professionals, and/or patients and families  
40  
41

### 42 **Initiative**

43 A broad term that can refer to organization-wide programs, narrowly focused projects, or the details  
44 of specific interventions (for example, planning, execution, and assessment)  
45  
46

### 47 **Internal validity**

48 Demonstrable, credible evidence for efficacy (meaningful impact or change) resulting from  
49 introduction of a specific intervention into a particular healthcare [system](#).  
50  
51

### 52 **Intervention(s)**

53 The specific activities and tools introduced into a healthcare [system](#) with the aim of changing its  
54 performance for the better. Complete description of an intervention includes its inputs, internal  
55 activities, and outputs (in the form of a logic model, for example), and the mechanism(s) by which  
56 these components are expected to produce changes in a [system's](#) performance.  
57  
58

### 59 **Opportunity costs**

1  
2  
3 Loss of the ability to perform other tasks or meet other responsibilities resulting from the diversion  
4 of resources needed to introduce, test, or sustain a particular [improvement](#) initiative  
5  
6

### 7 **Problem**

8 Meaningful disruption, failure, inadequacy, distress, confusion or other dysfunction in a healthcare  
9 service delivery [system](#) that adversely affects patients, staff, or the [system](#) as a whole, or that  
10 prevents care from reaching its full potential  
11

### 12 **Process**

13 The routines and other activities through which healthcare services are delivered  
14  
15

### 16 **Rationale**

17 Explanation of why particular [intervention\(s\)](#) were chosen and why it was expected to work, be  
18 sustainable, and be replicable elsewhere.  
19

### 20 **Systems**

21 The interrelated structures, people, [processes](#), and activities that together create healthcare services  
22 for and with individual patients and populations. For example, systems exist from the personal self-  
23 care system of a patient, to the individual provider-patient dyad system, to the microsystem, to the  
24 macrosystem, and all the way to the market/social/insurance system. These levels are nested within  
25 each other.  
26  
27

### 28 **Theory or theories**

29 Any “reason-giving” account that asserts causal relationships between variables (causal theory) or  
30 that makes sense of an otherwise obscure [process](#) or situation (explanatory theory). Theories come  
31 in many forms, and serve different purposes in the phases of [improvement](#) work. It is important to  
32 be explicit and well-founded about any informal and formal theory (or theories) that are used.  
33  
34  
35  
36  
37  
38  
39  
40  
41  
42  
43  
44  
45  
46  
47  
48  
49  
50  
51  
52  
53  
54  
55  
56  
57  
58  
59  
60
