# Supplementary material for: Prospective observational study of gender and ethnicity biases in respiratory protective equipment for healthcare workers in the COVID-19 pandemic
Source: PubMed Central journal article supplement — BMJ Open. 2021 May 20;11(5):e047716. doi: 10.1136/bmjopen-2020-047716 (PMC8141377; doi:10.1136/bmjopen-2020-047716), 2021-05-20
Supplement: bmjopen-2020-047716supp002.pdf [file bmjopen-2020-047716supp002.pdf]

Figure B

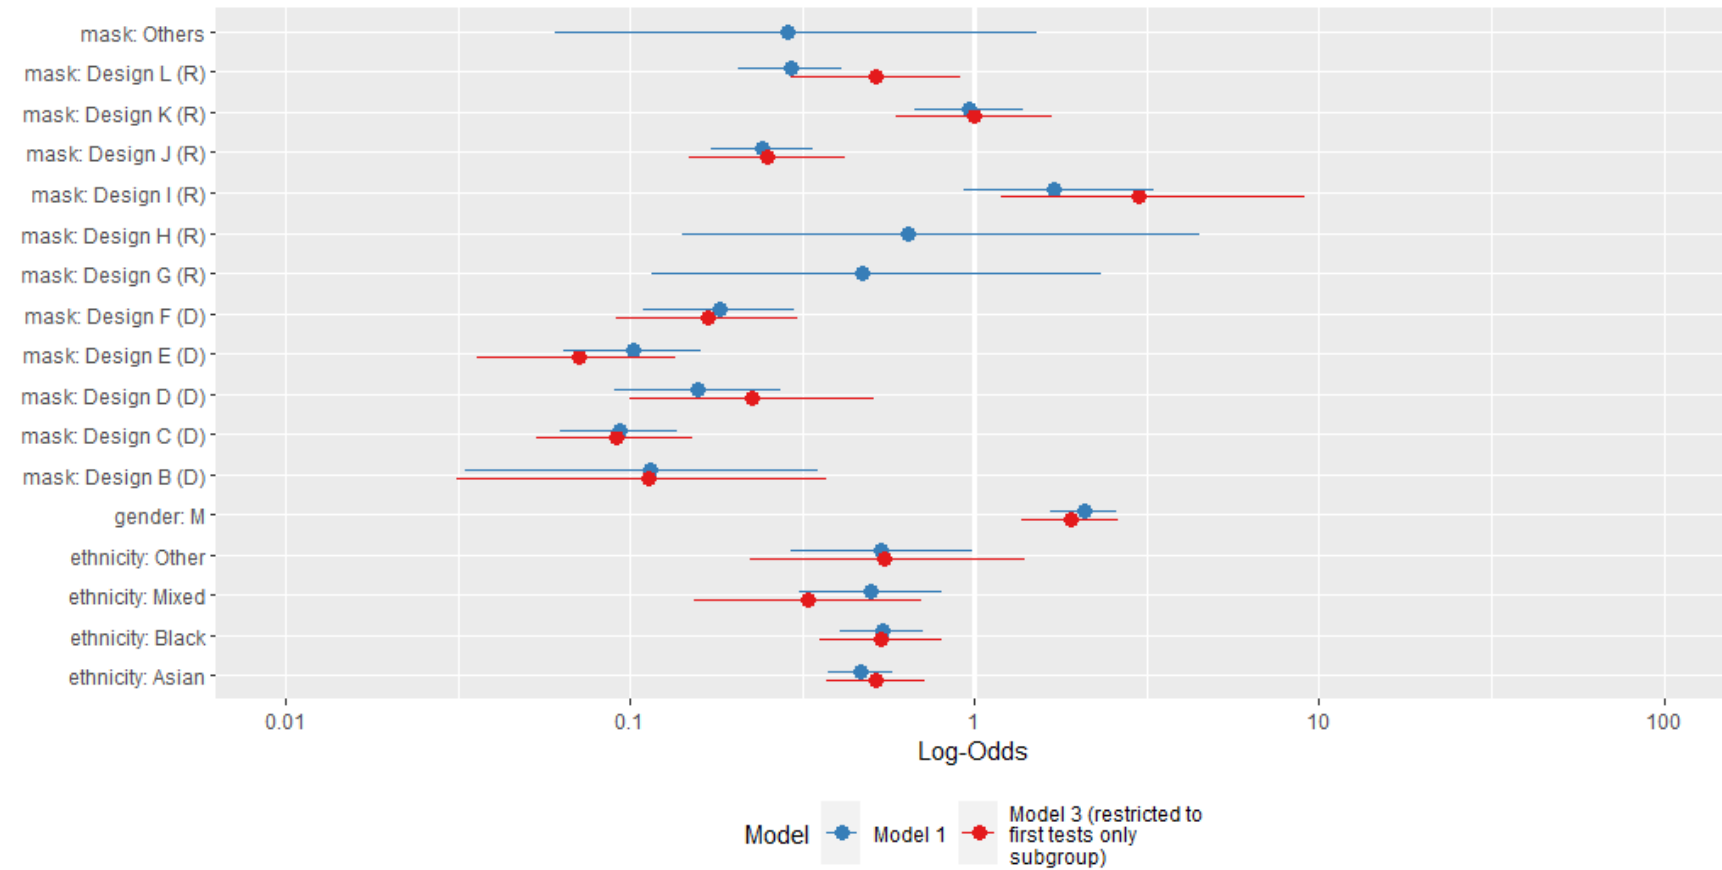

Figure A: Forest plot comparing the fixed effects point estimates and 95% confidence intervals the original model in the manuscript (Model 1) compared to a revised model fitted using only subgroup data from first fit test attempts (Model 3).
