# Supplementary material for: Prospective observational study of gender and ethnicity biases in respiratory protective equipment for healthcare workers in the COVID-19 pandemic
Source: PubMed Central journal article supplement — BMJ Open. 2021 May 20;11(5):e047716. doi: 10.1136/bmjopen-2020-047716 (PMC8141377; doi:10.1136/bmjopen-2020-047716), 2021-05-20
Supplement: bmjopen-2020-047716supp003.pdf [file bmjopen-2020-047716supp003.pdf]

## Supplementary Table

*Supplementary Table: Description of Different Masks Used*

| <b>Mask Design</b> | <b>Manufacturer</b> | <b>Model</b>        | <b>Shape</b>     | <b>Expiratory Filter Y/N</b> | <b>Reusable (R) / Disposable (D)</b> | <b>Grade of mask</b>  |
|--------------------|---------------------|---------------------|------------------|------------------------------|--------------------------------------|-----------------------|
| A                  | Full Support Group  | Easimask FSM18      | Cup              | N                            | D                                    | FFP3 / N99 equivalent |
| B                  | Full Support Group  | Easimask FSM16      | Duckbill         | N                            | D                                    | FFP3 / N99 equivalent |
| C                  | 3M                  | 1863                | Fold out 3 Panel | N                            | D                                    | FFP3 / N99 equivalent |
| D                  | 3M                  | 8833                | Cup              | Y                            | D                                    | FFP3 / N99 equivalent |
| E                  | 3M                  | 1873                | Fold out 3 Panel | Y                            | D                                    | FFP3 / N99 equivalent |
| F                  | 3M                  | Aura 1863+          | Fold out 3 Panel | N                            | D                                    | FFP3 / N99 equivalent |
| G                  | 3M                  | 6500 +P3 Filter     | Half mask        | Y                            | R                                    | FFP3 / N99 equivalent |
| H                  | 3M                  | 7500 +P3 Filter     | Half mask        | Y                            | R                                    | FFP3 / N99 equivalent |
| I                  | Scott Safety        | Aviva 50 +P3 Filter | Half mask        | Y                            | R                                    | FFP3 / N99 equivalent |
| J                  | JSP Safety          | Force 8 +P3 Filter  | Half mask        | Y                            | R                                    | FFP3 / N99 equivalent |
| K                  | Sundstrom           | SR100 +P3 Filter    | Half mask        | Y                            | R                                    | FFP3 / N99 equivalent |
| L                  | PureFlo             | PF1000 +P3 Filter   | Half mask        | Y                            | R                                    | FFP3 / N99 equivalent |
